# Supplementary material for: Dynamics of riverine CO 2 in the Yangtze River fluvial network and theirimplications for carbon evasion
Source: Copernicus journal article supplement (doi:10.5194/bg-2016-507), 2016-12-12
Supplement: Supplementary file [file bg-2016-507-AC1-supplement.zip]

Table S1. pH, alkalinity, and  $p\text{CO}_2$  in the Yangtze River network (median  $\pm$  standard deviation).

| River name       | Station name | Coordinates      |                 | pH             | Alkalinity<br>$\mu\text{eq L}^{-1}$ | $p\text{CO}_2$<br>$\mu\text{atm}$ |
|------------------|--------------|------------------|-----------------|----------------|-------------------------------------|-----------------------------------|
|                  |              | Longitude<br>(E) | Latitude<br>(N) |                |                                     |                                   |
| Yangtze mainstem | Benzilan     | 99.289           | 28.283          | 8.3 $\pm$ 0.11 | 2352 $\pm$ 435                      | 681 $\pm$ 156                     |
| Yangtze mainstem | Shigu        | 99.958           | 26.902          | 8.2 $\pm$ 0.48 | 2544 $\pm$ 438                      | 846 $\pm$ 263                     |
| Yangtze mainstem | Dukou        | 101.7167         | 26.591          | 8.3 $\pm$ 0.12 | 2399 $\pm$ 429                      | 826 $\pm$ 197                     |
| Chongjianghe     | Laiyuanqiao  | 99.929           | 26.854          | 7.4 $\pm$ 0.31 | 1410 $\pm$ 334                      | 3465 $\pm$ 2003                   |
| Shuoduogang      | Xiaqiaotou   | 100.05           | 27.18333        | 8.6 $\pm$ 0.21 | 1963 $\pm$ 214                      | 249 $\pm$ 183                     |
| Wulanghe         | Zongguantian | 100.5667         | 26.807          | 8.4 $\pm$ 0.21 | 2525 $\pm$ 603                      | 598 $\pm$ 293                     |
| Yanggongjiang    | Mujiaqiao    | 100.2833         | 26.8            | 7.6 $\pm$ 0.28 | 4296 $\pm$ 406                      | 5596 $\pm$ 2377                   |
| Yanggongjiang    | Heqing       | 100.2167         | 26.5            | 8.2 $\pm$ 0.27 | 3135 $\pm$ 235                      | 1220 $\pm$ 1212                   |
| Luolouhe         | Huangping    | 100.3667         | 26.08333        | 8.2 $\pm$ 0.27 | 3509 $\pm$ 648                      | 1303 $\pm$ 1355                   |
| Sangyuanhe       | Dahuizhuang  | 100.535          | 25.95           | 8.0 $\pm$ 0.27 | 5580 $\pm$ 1456                     | 3500 $\pm$ 3264                   |
| Shuoduogang      | Xiaozhongxun | 99.79649         | 27.55608        | 7.5 $\pm$ 0.04 | 1533 $\pm$ 244                      | 2812 $\pm$ 421                    |
| Chenghai         | Hekoujie     | 100.654          | 26.477          | 9.0 $\pm$ 0.25 | 12997 $\pm$ 1471                    | 740 $\pm$ 784                     |
| Maguohe          | Renli        | 100.983          | 26.507          | 7.9 $\pm$ 0.42 | 3252 $\pm$ 831                      | 2675 $\pm$ 2507                   |
| Xinzhuanghe      | Shilongba    | 101.3615         | 26.59361        | 7.8 $\pm$ 0.31 | 4467 $\pm$ 723                      | 3801 $\pm$ 2903                   |
| Yalongjiang      | Xiaodeshi    | 101.835          | 26.75           | 8.0 $\pm$ 0.22 | 2576 $\pm$ 465                      | 1567 $\pm$ 715                    |
| Ningbohe         | Zhuangfang   | 100.8667         | 27.28333        | 7.6 $\pm$ 0.32 | 2647 $\pm$ 411                      | 3103 $\pm$ 2039                   |
| Yangtze mainstem | Jinjiangjie  | 100.55           | 26.224          | 8.1 $\pm$ 0.12 | 1905 $\pm$ 362                      | 916 $\pm$ 202                     |
| Anninghe         | Manshuiwan   | 102.1667         | 28.23333        | 7.6 $\pm$ 0.31 | 1169 $\pm$ 353                      | 1774 $\pm$ 1354                   |
| Anninghe         | Wantan       | 101.9333         | 26.738          | 7.5 $\pm$ 0.14 | 1609 $\pm$ 426                      | 2944 $\pm$ 746                    |
| Yangtze mainstem | Huadan       | 102.92           | 26.866          | 8.2 $\pm$ 0.15 | 2237 $\pm$ 418                      | 882 $\pm$ 287                     |
| Haihe            | Yuanjiashan  | 102.2138         | 27.88866        | 8.0 $\pm$ 0.21 | 2067 $\pm$ 369                      | 1327 $\pm$ 833                    |
| Yangtze mainstem | Longjie      | 101.9167         | 25.985          | 8.2 $\pm$ 0.17 | 2185 $\pm$ 396                      | 786 $\pm$ 226                     |
| Haikouhe         | Haikou       | 102.6            | 24.78333        | 8.1 $\pm$ 0.50 | 2547 $\pm$ 2370                     | 3271 $\pm$ 4570                   |
| Longchuanjiang   | Xiaohekou    | 101.5667         | 25.05           | 7.8 $\pm$ 0.34 | 3539 $\pm$ 1038                     | 3285 $\pm$ 4346                   |
| Longchuanjiang   | Huangguayuan | 101.8667         | 25.83333        | 8.0 $\pm$ 0.36 | 3854 $\pm$ 1060                     | 2771 $\pm$ 3614                   |
| Jinglinghe       | Duke         | 101.7667         | 25.85           | 8.3 $\pm$ 0.36 | 2686 $\pm$ 556                      | 951 $\pm$ 1930                    |
| Mengguohe        | Gaoqiao      | 102.1667         | 25.64           | 8.0 $\pm$ 0.36 | 2828 $\pm$ 488                      | 1499 $\pm$ 2424                   |
| Tanglangchuan    | Anning       | 102.4833         | 24.913          | 8.0 $\pm$ 0.54 | 3473 $\pm$ 688                      | 1968 $\pm$ 5001                   |
| Tanglangchuan    | Caijiacun    | 102.4333         | 25.16667        | 8.3 $\pm$ 0.36 | 3385 $\pm$ 542                      | 1062 $\pm$ 2064                   |
| Panlongjiang     | Kunming      | 102.723          | 25.06           | 7.6 $\pm$ 0.38 | 3728 $\pm$ 861                      | 5112 $\pm$ 6412                   |
| Xiaohe           | Xiaohe       | 102.8333         | 25.203          | 7.5 $\pm$ 0.26 | 3684 $\pm$ 613                      | 6807 $\pm$ 4361                   |
| Dianweihe        | Dianwei      | 102.8667         | 25.21667        | 7.5 $\pm$ 0.27 | 3076 $\pm$ 394                      | 6224 $\pm$ 4222                   |
| Dianchi          | Zhongtan     | 102.662          | 24.797          | 8.2 $\pm$ 0.37 | 2787 $\pm$ 433                      | 901 $\pm$ 1509                    |
| Dianchi          | Haigeng      | 102.655          | 24.96667        | 8.2 $\pm$ 0.33 | 2963 $\pm$ 521                      | 981 $\pm$ 1384                    |
| Heishuihe        | Ningnan      | 102.7167         | 27.05           | 7.8 $\pm$ 0.17 | 2490 $\pm$ 592                      | 2384 $\pm$ 1290                   |
| Zhaojuehe        | Zhaojue      | 102.85           | 28.01667        | 7.5 $\pm$ 0.22 | 1511 $\pm$ 266                      | 2738 $\pm$ 1642                   |
| Niulanjiang      | Qixingqiao   | 103.3167         | 25.55           | 8.1 $\pm$ 0.49 | 2764 $\pm$ 417                      | 1123 $\pm$ 2010                   |
| Niulanjiang      | Huanglishu   | 103.7333         | 26.5            | 8.2 $\pm$ 0.41 | 2912 $\pm$ 269                      | 1074 $\pm$ 1309                   |
| Chelongjiang     | Siying       | 103.2251         | 25.34794        | 7.9 $\pm$ 0.41 | 3016 $\pm$ 438                      | 2289 $\pm$ 2433                   |
| Chelongjiang     | Tangzi       | 103.252          | 27.136          | 7.8 $\pm$ 0.23 | 3557 $\pm$ 999                      | 2704 $\pm$ 1256                   |
| Meiguhe          | Meigu        | 102.9833         | 28.21667        | 7.5 $\pm$ 0.10 | 1555 $\pm$ 259                      | 2869 $\pm$ 712                    |
| Baishuijiang     | Niujie       | 104.4833         | 27.85           | 7.8 $\pm$ 0.37 | 1961 $\pm$ 462                      | 2052 $\pm$ 2494                   |
| Guanhe           | Doushaguan   | 104.1333         | 28.03333        | 7.8 $\pm$ 0.29 | 2040 $\pm$ 444                      | 1568 $\pm$ 2254                   |
| Luozehe          | Malucun      | 104.0333         | 27.65           | 7.7 $\pm$ 0.27 | 2393 $\pm$ 521                      | 2740 $\pm$ 2125                   |
| Sayuhe           | Qingkoutang  | 103.65           | 27.46667        | 7.4 $\pm$ 0.35 | 1057 $\pm$ 715                      | 2461 $\pm$ 3300                   |

|                  |              |          |          |          |           |           |
|------------------|--------------|----------|----------|----------|-----------|-----------|
| Julehe           | Yudong       | 103.552  | 27.4     | 7.1±0.34 | 636±233   | 3664±3073 |
| Zhaoluda         | Xinquan      | 103.65   | 27.388   | 7.8±0.34 | 2742±1620 | 2346±2854 |
| Yangtze mainstem | Pingshan     | 104.3167 | 28.63333 | 8.2±0.10 | 2215±407  | 1000±235  |
| Yangtze mainstem | Zhutuo       | 105.85   | 29.01667 | 7.8±0.19 | 2299±349  | 2405±781  |
| Yangtze mainstem | Cuntan       | 106.6    | 29.61667 | 8.1±0.11 | 2173±312  | 1087±319  |
| Nanguanghe       | Fuxi         | 104.6833 | 28.66667 | 7.5±0.20 | 1927±286  | 3485±1990 |
| Chishuihe        | Maotai       | 106.35   | 27.85    | 7.8±0.19 | 2662±264  | 2936±1391 |
| Chishuihe        | Chishui      | 105.6833 | 28.58333 | 7.6±0.21 | 2314±336  | 3743±2008 |
| Guanduhe         | Tongzi       | 106.8167 | 28.11667 | 7.6±0.21 | 3037±383  | 4304±2648 |
| Songkanhe        | Songkan      | 106.862  | 28.545   | 7.7±0.16 | 2694±260  | 2938±1004 |
| Xiangxi          | Xingshan     | 110.75   | 31.23333 | 8.2±0.28 | 2484±331  | 868±784   |
| Qijiang          | Wucha        | 106.4667 | 29.11667 | 7.6±0.32 | 2495±191  | 3862±2042 |
| Yangtze mainstem | Yichang      | 111.302  | 30.676   | 7.9±0.15 | 2343±300  | 1653±469  |
| Yangtze mainstem | Luoshan      | 113.3667 | 29.66667 | 7.8±0.11 | 2280±248  | 2380±691  |
| Yangtze mainstem | Wuhan        | 114.298  | 30.58333 | 7.9±0.11 | 2060±263  | 1521±497  |
| Lushui           | Chongyang    | 114.033  | 29.693   | 7.3±0.38 | 892±433   | 2658±1955 |
| Xianninghe       | Shihaoqiao   | 114.2833 | 29.85    | 7.7±0.29 | 2001±963  | 2448±1557 |
| Dayehu           | Weiyuankou   | 115.2333 | 30.15    | 7.8±0.35 | 1763±330  | 1513±2111 |
| Jushui           | Macheng      | 115.04   | 31.2     | 7.6±0.38 | 971±263   | 1405±2005 |
| Bashui           | Luotian      | 115.407  | 30.8     | 7.5±0.40 | 921±268   | 1523±2155 |
| Lushui           | Puqi         | 113.885  | 29.71667 | 7.4±0.47 | 1423±522  | 2827±3843 |
| Xishui           | Yingshan     | 115.697  | 30.75    | 7.5±0.39 | 780±218   | 1485±1708 |
| Jianshui         | Xiheyi       | 115.4333 | 30.26667 | 7.6±0.41 | 842±242   | 1381±2065 |
| Huangbaihe       | Xiaoxita     | 111.33   | 30.804   | 7.7±0.23 | 2726±389  | 3320±1193 |
| Juhe             | Houziyan     | 111.6667 | 30.98333 | 8.0±0.23 | 3089±584  | 1737±1328 |
| Zhanghezong      | Jishang      | 112.149  | 30.86    | 8.3±0.16 | 2560±176  | 792±394   |
| Qingjiang        | Lichuan      | 108.9329 | 30.29096 | 7.6±0.16 | 2278±404  | 3647±1172 |
| Juzhanghe        | Herong       | 111.96   | 30.68333 | 8.3±0.13 | 3041±361  | 901±335   |
| Qingjiang        | Enshi        | 109.4667 | 30.3     | 8.0±0.24 | 2323±417  | 1540±1129 |
| Yuyanghe         | Niejiahe     | 111.3    | 30.3     | 8.0±0.26 | 2627±374  | 1427±1138 |
| Qingjiang        | Banyuju      | 111.296  | 30.481   | 8.0±0.10 | 2325±180  | 1399±299  |
| Lushui           | Guijiaban    | 113.9333 | 29.69    | 7.7±0.28 | 1347±750  | 1379±1259 |
| Gaodihe          | Maojiagiao   | 114.15   | 29.495   | 7.8±0.12 | 2205±689  | 1894±660  |
| Dashihe          | Bainiqiao    | 114.168  | 29.535   | 7.9±0.13 | 3271±832  | 2546±726  |
| Yangtze mainstem | Datong       | 117.6167 | 30.76667 | 7.8±0.14 | 1919±312  | 1641±806  |
| Houhe            | Dongzhi      | 117.0098 | 30.05211 | 7.0±0.29 | 760±162   | 4338±3045 |
| Houhe            | Zhide        | 117.169  | 30.022   | 7.1±0.32 | 791±953   | 4729±2554 |
| Qiupuhe          | Gaotan       | 117.431  | 30.365   | 7.5±0.22 | 1949±362  | 3622±2082 |
| Wushanhu         | Guanqiao     | 115.5462 | 29.97072 | 7.9±0.39 | 1765±536  | 1304±1946 |
| Xiandahe         | Susong       | 116.0724 | 30.21069 | 7.3±0.32 | 1415±480  | 4483±3104 |
| Changhe          | Hualiangting | 116.278  | 30.43333 | 7.1±0.35 | 874±364   | 4407±3016 |
| Qianshui         | Qianshan     | 116.55   | 30.63333 | 7.2±0.36 | 1005±314  | 3572±4139 |
| Wanshui          | Yuexi        | 116.417  | 30.891   | 7.2±0.31 | 1036±353  | 4684±2912 |
| Yuxihe           | Chaoxian     | 117.886  | 31.55    | 7.3±0.33 | 1141±558  | 3617±2975 |
| Chaohu           | Zhongmiao    | 117.4667 | 31.58333 | 7.3±0.33 | 1067±352  | 3630±2659 |
| Xihe             | Liangjiaba   | 117.675  | 31.171   | 7.3±0.30 | 999±608   | 3712±2123 |
| Qingyijiang      | Dalongfang   | 118.449  | 31.335   | 7.4±0.31 | 1438±507  | 4015±2271 |
| Shuiyangjiang    | Xuancheng    | 118.796  | 30.95    | 7.4±0.23 | 1535±324  | 3732±2147 |
| Guxihe           | Dangtu       | 118.4833 | 31.55    | 7.3±0.17 | 1285±365  | 4312±1236 |

|              |              |          |          |          |           |           |
|--------------|--------------|----------|----------|----------|-----------|-----------|
| Chuhe        | Chaheji      | 118.6    | 32.2     | 7.5±0.37 | 2117±579  | 3942±2776 |
| Zhongdongjin | Helixi       | 119.003  | 30.638   | 7.5±0.19 | 2056±365  | 3604±2324 |
| Wuyihe       | Chuxian      | 118.372  | 32.27    | 7.3±0.28 | 1998±972  | 5522±5319 |
| Xinanjiang   | Tunxi        | 118.285  | 29.6998  | 7.7±0.30 | 1482±508  | 1972±1062 |
| Zhongjianhe  | Xuanen       | 109.4667 | 29.98333 | 8.1±0.05 | 2496±213  | 1206±174  |
| Changhu      | Xijiakou     | 112.482  | 30.416   | 8.1±0.40 | 1732±229  | 742±749   |
| Honghu       | Xindi        | 113.4333 | 29.767   | 8.0±0.51 | 1817±583  | 1047±1444 |
| Minjiang     | Pengshan     | 103.8833 | 30.2     | 7.5±0.14 | 2620±506  | 4472±2281 |
| Minjiang     | Wutongqiao   | 103.8167 | 29.35    | 7.5±0.23 | 2020±267  | 3660±2129 |
| Minjiang     | Gaochang     | 104.4167 | 28.8     | 8.0±0.15 | 1816±327  | 1020±525  |
| Najiang      | Wangmiaona   | 103.6069 | 31.00786 | 7.8±0.23 | 2120±410  | 2000±1641 |
| Najiang      | Miaowaijiang | 103.6068 | 31.00213 | 8.0±0.15 | 2168±570  | 1367±415  |
| Mabianhe     | Qingshuixi   | 103.8833 | 29.15    | 7.7±0.23 | 1769±219  | 2306±2306 |
| Daduhe       | Luding       | 102.2333 | 29.91667 | 7.7±0.12 | 2162±403  | 2172±427  |
| Daduhe       | Shimian      | 102.3667 | 29.25    | 7.9±0.17 | 2036±1002 | 1729±1113 |
| Daduhe       | Fuluzhen     | 103.65   | 29.3     | 7.6±0.23 | 1909±289  | 2577±1620 |
| Niurihe      | Yanrun       | 102.7833 | 28.98333 | 7.6±0.15 | 1684±352  | 2614±776  |
| Qingyijiang  | Duoyingping  | 102.95   | 30       | 7.6±0.19 | 1819±239  | 2455±1525 |
| Qingyijiang  | Jiajiang     | 103.5333 | 29.75    | 7.5±0.20 | 1823±255  | 3056±2084 |
| Mianyuanhe   | Hanwangchang | 104.15   | 31.46667 | 7.7±0.25 | 2326±296  | 2486±2127 |
| Tuojiang     | Sanhuangmiao | 104.4833 | 30.8     | 7.6±0.21 | 3163±783  | 4216±2699 |
| Tuojiang     | Honglang     | 104.646  | 30.289   | 7.5±0.19 | 2874±602  | 4404±2345 |
| Tuojiang     | Dengyingyan  | 104.7333 | 29.9     | 7.7±0.24 | 2962±565  | 4077±3042 |
| Tuojiang     | Shipantan    | 105.0333 | 29.5     | 7.6±0.17 | 2752±509  | 4368±2432 |
| Tuojiang     | Lijiawan     | 104.9667 | 29.13333 | 8.0±0.11 | 2705±507  | 1504±572  |
| Yanjinghe    | Shawan       | 106.2214 | 29.663   | 7.7±0.29 | 2937±553  | 3282±3989 |
| Jialingjiang | Dongpo       | 106.436  | 33.858   | 7.6±0.40 | 2247±554  | 2897±3473 |
| Jialingjiang | Tanjiazhuang | 106.2    | 33.7     | 8.1±0.36 | 2607±528  | 1084±1815 |
| Jialingjiang | Lüeyang      | 106.124  | 33.34    | 8.0±0.25 | 3099±537  | 2054±2266 |
| Jialingjiang | Xindianzi    | 105.85   | 32.58333 | 7.8±0.18 | 2465±650  | 2069±687  |
| Jialingjiang | Tingzikou    | 105.8167 | 31.85    | 7.7±0.23 | 2869±567  | 3081±1732 |
| Jialingjiang | Jinyintai    | 106.05   | 31.55    | 7.7±0.21 | 2590±604  | 2773±1529 |
| Jialingjiang | Nanchong     | 106.0833 | 30.8     | 7.8±0.22 | 2793±504  | 2857±1713 |
| Jialingjiang | Wusheng      | 106.2833 | 30.35    | 8.1±0.13 | 2401±464  | 1154±321  |
| Hongyahe     | Yangdian     | 106.4242 | 33.93103 | 8.1±0.34 | 2525±518  | 1087±861  |
| Changfenghe  | Chengxian    | 105.76   | 33.71667 | 7.7±0.35 | 2721±429  | 3255±3283 |
| Jialingjiang | Beibei       | 106.4167 | 29.85    | 8.1±0.14 | 2289±509  | 1196±244  |
| Xihanshui    | Shunlixia    | 105.1167 | 34.1     | 7.7±0.44 | 2924±668  | 3248±3788 |
| Xihanshui    | Daqiao       | 105.2833 | 33.75    | 8.1±0.34 | 3049±546  | 1431±2044 |
| Bailongjiang | Gengu        | 103.3833 | 34.01667 | 7.9±0.36 | 3394±426  | 2268±2195 |
| Bailongjiang | Lijie        | 104.0667 | 33.9     | 7.8±0.43 | 3264±548  | 2508±3653 |
| Bailongjiang | Diangasi     | 103.7167 | 33.95    | 7.5±0.25 | 2607±545  | 4504±1788 |
| Bailongjiang | Wudou        | 104.92   | 33.39    | 7.8±0.40 | 3125±463  | 2564±3035 |
| Bailongjiang | Bikou        | 105.25   | 32.745   | 7.8±0.37 | 2738±371  | 2350±3383 |
| Bailongjiang | Qianfeng     | 104.897  | 33.042   | 7.9±0.20 | 2994±858  | 2360±1011 |
| Bailongjiang | Sanleiba     | 105.6333 | 32.45    | 7.9±0.21 | 2954±730  | 2085±969  |
| Minhe        | Sanpanzi     | 104.55   | 33.88333 | 8.1±0.33 | 3358±399  | 1529±2598 |
| Beiyuhe      | Majie        | 104.95   | 33.46667 | 7.7±0.40 | 2541±785  | 2909±4473 |
| Baishuijiang | Guyiba       | 104.6333 | 32.96667 | 8.0±0.29 | 3058±269  | 1503±1686 |

|              |               |          |          |          |           |           |
|--------------|---------------|----------|----------|----------|-----------|-----------|
| Baishuijiang | Jiaheba       | 105.0833 | 32.821   | 7.9±0.31 | 2777±319  | 2161±3012 |
| Rangshuihe   | Caoba         | 105.1372 | 32.73006 | 7.6±0.40 | 1020±448  | 1639±2069 |
| Donghe       | Qingquanxiang | 106.0667 | 31.71667 | 7.6±0.15 | 2215±300  | 3501±1002 |
| Qingjianghe  | Qingjiang     | 105.4667 | 32.306   | 7.5±0.20 | 2027±408  | 2918±1618 |
| Qingjianghe  | Shangsi       | 105.267  | 31.35    | 7.6±0.21 | 2108±511  | 2698±1599 |
| Xihe         | Jianshexiang  | 106.039  | 31.295   | 7.4±0.21 | 2313±345  | 5079±3295 |
| Bahe         | Fengtang      | 107.1    | 31.5     | 8.0±0.22 | 2233±373  | 1474±1029 |
| Qujiang      | Goudukou      | 107      | 30.85    | 7.7±0.21 | 2114±351  | 2299±1018 |
| Qujiang      | Luoduxi       | 106.5833 | 30.33333 | 8.0±0.11 | 2077±953  | 1211±803  |
| Zhouhe       | Donglin       | 107.6833 | 31.28333 | 8.0±0.18 | 2193±459  | 1399±1324 |
| Houhe        | Maoba         | 107.75   | 31.61667 | 7.8±0.22 | 2215±456  | 2094±915  |
| Liujianghe   | Jingbian      | 106.8333 | 31.01667 | 8.1±0.21 | 2743±572  | 1367±1099 |
| Fujiang      | Fujiangqiao   | 104.7167 | 31.51667 | 7.7±0.20 | 2325±1169 | 2271±1722 |
| Fujiang      | Shehong       | 105.4    | 30.86667 | 7.7±0.18 | 2475±433  | 2479±1246 |
| Fujiang      | Xiaoheba      | 106.0167 | 30.06667 | 8.1±0.15 | 2262±419  | 1045±388  |
| Wujiang      | Wujiangdu     | 106.796  | 27.315   | 7.6±0.11 | 2279±268  | 3779±1236 |
| Wujiang      | Sinan         | 108.248  | 27.9     | 7.6±0.20 | 2893±342  | 4510±2190 |
| Wujiang      | Wulong        | 107.7167 | 29.28333 | 8.0±0.14 | 2420±279  | 1360±508  |
| Sanchahe     | Niuchishui    | 105.0833 | 26.649   | 7.6±0.04 | 2385±262  | 3443±558  |
| Sanchahe     | Sanchahe      | 105.744  | 26.391   | 7.9±0.45 | 2394±324  | 1835±1836 |
| Liuchonghe   | Qixingguan    | 104.9333 | 27.15    | 7.6±0.05 | 2344±224  | 3392±452  |
| Liuchonghe   | Hongjiadu     | 105.865  | 26.863   | 7.6±0.05 | 2338±287  | 3279±419  |
| Daotianhe    | Xuhuatun      | 105.25   | 27.346   | 7.6±0.10 | 2836±344  | 4174±951  |
| Xingjiang    | Pingzhai      | 106.15   | 26.254   | 7.8±0.33 | 3305±558  | 2922±2250 |
| Yangchanghe  | Huangmaocun   | 106.322  | 26.401   | 7.9±0.27 | 2894±560  | 2420±1844 |
| Xiaoguankou  | Qiyangqiao    | 106.2983 | 26.515   | 8.0±0.28 | 4389±2003 | 2251±2433 |
| Xiangjiang   | Hehuihe       | 106.926  | 27.73333 | 7.7±0.23 | 3324±583  | 3923±2761 |
| Xiangjiang   | Xiangjiang    | 107.314  | 27.659   | 7.6±0.27 | 3324±550  | 4940±2898 |
| Xiangjiang   | Liyutang      | 107.26   | 27.437   | 7.8±0.17 | 3434±209  | 3078±965  |
| Luowanghe    | Dongtou       | 106.941  | 26.954   | 7.9±0.10 | 3268±182  | 2337±492  |
| Dacaohe      | Longli        | 106.95   | 26.45    | 7.8±0.16 | 2734±296  | 2896±879  |
| Nanminghe    | Huaxi         | 106.673  | 26.46667 | 7.6±0.11 | 3693±186  | 5672±1548 |
| Nanminghe    | Guiyang       | 106.96   | 26.732   | 7.5±0.20 | 3707±287  | 7718±4086 |
| Xiangjiang   | Hongjunshan   | 106.914  | 27.71667 | 7.8±0.26 | 3262±523  | 3551±3548 |
| Xiangjiang   | Longxiqiao    | 106.9333 | 27.664   | 7.7±0.29 | 3150±512  | 3509±3855 |
| Gaoqiaohe    | Gaoqiao       | 106.89   | 27.673   | 7.7±0.16 | 3590±583  | 3531±2233 |
| Yuqinghe     | Yuqing        | 107.75   | 27.26667 | 7.7±0.24 | 2966±1017 | 3608±2628 |
| Shiqianhe    | Shiqian       | 108.3667 | 27.565   | 7.6±0.16 | 2637±795  | 4282±1689 |
| Yinjiang     | Yinjiang      | 108.3833 | 28       | 7.6±0.17 | 2425±495  | 4083±1704 |
| Hongduhe     | Jiangbin      | 107.9333 | 28.6     | 7.8±0.15 | 3305±199  | 3153±1092 |
| Furongjiang  | Changba       | 107.684  | 28.723   | 7.8±0.20 | 2882±126  | 2731±1567 |
| Meijiang     | Meitan        | 107.675  | 28.911   | 7.8±0.11 | 3402±408  | 3135±1198 |
| Zitonghe     | Tianxiansi    | 105.4    | 31.01667 | 7.9±0.24 | 3695±765  | 2462±1622 |
| Xiangjiang   | Quanzhou      | 111.1    | 25.98333 | 7.4±0.38 | 1800±318  | 3711±2611 |
| Xiangjiang   | Laobutou      | 111.6    | 26.26667 | 7.5±0.20 | 1737±303  | 3014±1506 |
| Xiangjiang   | Hengshan      | 112.8667 | 27.23333 | 7.5±0.25 | 1808±254  | 3438±2065 |
| Xiangjiang   | Zhuzhou       | 113.15   | 27.81667 | 7.7±0.24 | 1613±255  | 1724±1109 |
| Xiangjiang   | Xiangtan      | 112.9167 | 27.86667 | 7.8±0.44 | 1739±331  | 2349±2521 |
| Xiaoshui     | Daoxian       | 111.361  | 26.168   | 7.4±0.20 | 1475±301  | 3617±1751 |

|               |              |          |          |          |           |           |
|---------------|--------------|----------|----------|----------|-----------|-----------|
| Xiaoshui      | Maojiangqiao | 111.68   | 25.955   | 7.6±0.15 | 1574±201  | 2296±1266 |
| Chonglingshui | Ouyanghai    | 112.6833 | 26.11667 | 7.6±0.18 | 2507±401  | 4071±1456 |
| Chonglingshui | Baisha       | 112.6833 | 26.16667 | 7.8±0.29 | 2254±377  | 2129±1869 |
| Leishui       | Leiyang      | 112.8667 | 26.41667 | 7.3±0.21 | 1616±282  | 5069±2401 |
| Leishui       | Dongjiang    | 113.244  | 25.949   | 7.7±0.12 | 1231±310  | 1453±703  |
| Leishui       | Paishuipian  | 113.4667 | 25.7     | 7.5±0.35 | 1550±313  | 3068±2320 |
| Chushui       | Jiaoming     | 113.393  | 25.715   | 7.4±0.10 | 1554±338  | 3516±1408 |
| Chenshui      | Chenzhou     | 113.039  | 25.8     | 7.8±0.14 | 2585±386  | 2101±798  |
| Mishui        | Longjiashan  | 113.45   | 26.86667 | 7.1±0.26 | 930±254   | 4461±2597 |
| Lushui        | Daxitan      | 113.45   | 27.66667 | 7.6±0.27 | 2164±702  | 3754±2454 |
| Lianshui      | Loudi        | 111.9667 | 27.75    | 7.8±0.17 | 2947±347  | 2431±1272 |
| Lianshui      | Xiangxiang   | 112.5167 | 27.71667 | 7.6±0.23 | 2305±466  | 3878±1589 |
| Zishui        | Zhayangtan   | 111.4333 | 27.66667 | 7.6±0.25 | 1930±330  | 2757±1803 |
| Zishui        | Xinhua       | 111.3    | 27.73333 | 7.4±0.25 | 1660±201  | 4391±3021 |
| Zishui        | Taojiang     | 112.255  | 28.125   | 7.5±0.27 | 1488±316  | 2972±1619 |
| Nanshui       | Huangqiao    | 110.85   | 27.03333 | 7.8±0.23 | 1912±349  | 2247±1486 |
| Yuanjiang     | Qiancheng    | 109.8167 | 27.18333 | 7.7±0.34 | 2389±642  | 2977±2921 |
| Yuanjiang     | Anjiang      | 110.1333 | 27.31667 | 7.6±0.29 | 1431±440  | 2312±1518 |
| Yuanjiang     | Yuanling     | 110.4    | 28.45    | 7.9±0.27 | 2056±1048 | 1566±1803 |
| Yuanjiang     | Taoyuan      | 111.4833 | 28.9     | 7.6±0.25 | 1822±480  | 2801±2144 |
| Qingshuijiang | Shidong      | 108.329  | 26.862   | 7.9±0.25 | 3230±514  | 2858±1755 |
| Qingshuijiang | Jinping      | 109.208  | 26.7     | 7.7±0.29 | 1867±488  | 2509±1386 |
| Maweihe       | Wenfengta    | 107.509  | 26.26667 | 7.5±0.08 | 2775±477  | 4695±1199 |
| Maweihe       | Xiasi        | 107.8167 | 26.534   | 7.8±0.22 | 3133±538  | 3041±1731 |
| Zhonganjiang  | Wanshui      | 107.985  | 26.745   | 7.9±0.19 | 3415±458  | 2698±1778 |
| Balahe        | Nanhua       | 108.072  | 26.53333 | 6.8±0.23 | 398±72    | 3314±1566 |
| Liudonghe     | Liudongqiao  | 108.85   | 26.95    | 6.9±0.22 | 711±167   | 4652±1924 |
| Qushui        | Yantou       | 109.75   | 26.83333 | 7.0±0.31 | 608±141   | 4187±2211 |
| Wushui        | Dacaiyuan    | 108.4    | 27.043   | 7.9±0.17 | 4202±534  | 3079±1181 |
| Wushui        | Yuping       | 108.9333 | 27.26667 | 7.7±0.17 | 3013±736  | 3602±1319 |
| Wushui        | Zhijiang     | 109.6667 | 27.46667 | 8.1±0.30 | 2926±667  | 1435±1718 |
| Chushui       | Simeng       | 110.5    | 27.83333 | 7.4±0.26 | 1200±252  | 2711±2044 |
| Chenshui      | Taoyi        | 109.85   | 27.86667 | 7.7±0.28 | 2086±454  | 2511±2128 |
| Jinjiang      | Lujiadong    | 109.2333 | 27.71667 | 7.5±0.18 | 2006±567  | 3677±1260 |
| Wushui        | Jishou       | 109.7333 | 28.31667 | 8.0±0.09 | 2657±226  | 1812±357  |
| Youshui       | Laifeng      | 109.4    | 29.5     | 7.6±0.17 | 1857±278  | 2569±1113 |
| Youshui       | Baojing      | 109.65   | 28.71667 | 7.7±0.24 | 2461±578  | 2787±1576 |
| Youshui       | Shidi        | 109.2167 | 28.75    | 7.8±0.25 | 1981±349  | 2249±1451 |
| Songtaohe     | Songtao      | 109.2167 | 28.18333 | 7.5±0.18 | 2177±562  | 3839±1371 |
| Ximenhe       | Fuquan       | 109.1638 | 26.27517 | 8.0±0.14 | 3834±363  | 2423±710  |
| Youshui       | Gaoqitou     | 110.35   | 28.63333 | 7.5±0.02 | 1898±264  | 3645±474  |
| Jiahe         | Zhaojiahe    | 109.984  | 33.076   | 8.0±0.12 | 2736±389  | 1721±564  |
| Baohe         | Hedongdian   | 106.9667 | 33.2     | 7.7±0.12 | 5227±1851 | 5036±3002 |
| Hanjiang      | Wuhouzheng   | 106.6167 | 33.15    | 8.0±0.29 | 2423±807  | 1812±2870 |
| Hanjiang      | Yangxian     | 107.5    | 33.21667 | 7.9±0.23 | 2633±754  | 1984±1469 |
| Hanjiang      | Shiquan      | 108.2333 | 33.03333 | 7.8±0.33 | 2600±559  | 2305±2582 |
| Hanjiang      | Ankang       | 109      | 32.66667 | 7.8±0.32 | 2321±467  | 2022±2457 |
| Qingshuihe    | Shengxiancun | 107.2667 | 33.26667 | 7.9±0.24 | 1854±589  | 1453±1097 |
| Mumahe        | Bailongtang  | 107.837  | 32.98    | 7.8±0.11 | 2707±387  | 2328±646  |

|            |              |          |          |          |          |           |
|------------|--------------|----------|----------|----------|----------|-----------|
| Mumahe     | Xixiang      | 107.751  | 32.979   | 7.9±0.24 | 2617±398 | 1781±1591 |
| Hanjiang   | Baihe        | 110.1167 | 32.81667 | 8.0±0.17 | 2067±337 | 1309±900  |
| Hanjiang   | Longwangmiao | 111.4333 | 32.572   | 8.1±0.27 | 2261±291 | 1019±944  |
| Hanjiang   | Yunxian      | 110.733  | 32.852   | 7.6±0.20 | 1986±358 | 2869±967  |
| Hanjiang   | Huangjiagang | 111.51   | 32.597   | 8.0±0.16 | 2013±264 | 1241±781  |
| Tianhe     | Jiajiafang   | 110.4167 | 32.96667 | 8.1±0.20 | 3743±875 | 1855±828  |
| Dongpaizi  | Shiqiao      | 111.9803 | 32.3585  | 8.0±0.18 | 2552±591 | 1439±472  |
| Hanjiang   | Nianpanshan  | 112.458  | 31.284   | 7.8±0.18 | 2179±470 | 1892±1416 |
| Duhe       | Huanglongtan | 110.55   | 32.68333 | 7.8±0.22 | 2087±292 | 1941±972  |
| Duhe       | Zhushan      | 110.2333 | 32.21667 | 8.0±0.18 | 1978±262 | 1174±593  |
| Nanhe      | Gucheng      | 111.553  | 32.252   | 8.1±0.16 | 2791±566 | 1379±431  |
| Nanhe      | Kaifengyu    | 111.25   | 32.03333 | 7.9±0.28 | 2515±911 | 1874±1144 |
| Qinghe     | Huangmaoshan | 111.9667 | 32.2     | 7.8±0.34 | 2012±463 | 2219±1881 |
| Qinghe     | Huangmaoshan | 112.015  | 32.201   | 7.4±0.21 | 2266±988 | 4708±3709 |
| Manhe      | Leihe        | 112.17   | 31.655   | 7.7±0.19 | 3411±957 | 3296±1849 |
| Danjiang   | Danfeng      | 110.3167 | 33.696   | 8.0±0.27 | 3093±612 | 2060±1629 |
| Danjiang   | Baidutan     | 111.473  | 33.012   | 7.9±0.21 | 2173±646 | 1636±923  |
| Laoguanhe  | Xixia        | 111.4833 | 33.26667 | 7.8±0.26 | 2351±639 | 2311±1748 |
| Tuanhe     | Yangzhai     | 111.854  | 33.05    | 7.8±0.28 | 3565±795 | 3385±2777 |
| Tuanhe     | Jitan        | 112.259  | 32.684   | 7.8±0.30 | 3004±797 | 3030±2453 |
| Baihe      | Xindianpu    | 112.31   | 32.417   | 7.8±0.18 | 2028±605 | 1765±589  |
| Tanghe     | Tanghe       | 112.822  | 32.697   | 7.7±0.29 | 2369±821 | 2509±2488 |
| Tanghe     | Guotan       | 112.598  | 32.521   | 7.6±0.25 | 1715±690 | 2599±1370 |
| Hanjiang   | Xiaoshicun   | 113.45   | 30.38333 | 7.9±0.13 | 2262±480 | 1715±536  |
| Watanhe    | Pijiaji      | 113.4312 | 30.29907 | 8.1±0.15 | 3403±375 | 1728±599  |
| Hanjiang   | Huangzhuang  | 112.561  | 31.176   | 7.9±0.17 | 2178±249 | 1475±851  |
| Yunshui    | Suixian      | 113.3667 | 31.7     | 7.8±0.28 | 1930±594 | 1994±1537 |
| Yunshui    | Geputan      | 113.704  | 30.95    | 7.8±0.31 | 2148±522 | 1920±1970 |
| Huanshui   | Huayuan      | 113.9667 | 31.25    | 7.4±0.29 | 1145±499 | 2751±1595 |
| Tianmenhe  | Huangtan     | 113.0833 | 30.66    | 7.9±0.21 | 2602±933 | 2298±1263 |
| Dafushui   | Yingcheng    | 113.55   | 30.95    | 8.0±0.26 | 3433±842 | 1964±1429 |
| Bengzhanhe | Hanchuanbeng | 113.85   | 30.65    | 7.9±0.24 | 2859±813 | 2120±2209 |
| Ganjiang   | Mianjin      | 114.8667 | 26.38333 | 7.3±0.32 | 832±233  | 2605±2642 |
| Ganjiang   | Jian         | 114.9833 | 27.1     | 7.3±0.34 | 830±221  | 2181±2853 |
| Ganjiang   | Xiajiang     | 115.15   | 27.55    | 7.3±0.30 | 820±276  | 2523±1884 |
| Ganjiang   | Waizhou      | 115.828  | 28.63333 | 7.4±0.44 | 880±236  | 2205±2048 |
| Zhangshui  | Bashang      | 114.95   | 25.81667 | 7.4±0.25 | 794±242  | 2150±1858 |
| Pingjiang  | Hanlinqiao   | 115.25   | 25.908   | 7.3±0.31 | 710±259  | 1900±2492 |
| Pingjiang  | Hongweiqiao  | 115.199  | 26.061   | 7.4±0.25 | 659±166  | 1754±1569 |
| Heshui     | Yongxin      | 114.25   | 26.95    | 7.5±0.31 | 1459±483 | 2866±3047 |
| Heshui     | Shangshalan  | 114.8    | 26.93333 | 7.4±0.35 | 1333±415 | 2825±2930 |
| Lushui     | Saitang      | 114.7667 | 27.18333 | 7.4±0.34 | 1226±440 | 3185±2955 |
| Wujiang    | Xintian      | 115.2833 | 27.2     | 7.3±0.33 | 979±294  | 3288±2889 |
| Tongjiang  | Hezhou       | 114.8167 | 27.45    | 7.2±0.41 | 839±294  | 3791±3690 |
| Yuanshui   | Jiangkou     | 114.8333 | 27.73333 | 7.6±0.31 | 1842±403 | 2985±2893 |
| Ganjiang   | Dingjiadu    | 115.8167 | 28.673   | 7.5±0.27 | 869±138  | 1627±2560 |
| Jinjiang   | Gaoan        | 115.3667 | 28.35    | 7.6±0.23 | 1299±220 | 2301±961  |
| Jinjiang   | Jiacun       | 115.3    | 28.36667 | 7.5±0.33 | 1436±326 | 2669±2889 |
| Fuhe       | Lijiadu      | 116.1667 | 28.21667 | 7.3±0.36 | 618±167  | 1975±2593 |

|             |              |          |          |          |          |           |
|-------------|--------------|----------|----------|----------|----------|-----------|
| Litanhe     | Shuixicun    | 116.9    | 27.3     | 7.1±0.32 | 541±426  | 2203±2263 |
| Baotangshui | Wutou        | 115.8667 | 27.61667 | 7.3±0.40 | 578±212  | 1945±2305 |
| Xinjiang    | Yiyang       | 117.4667 | 28.38333 | 7.4±0.40 | 924±594  | 2395±3022 |
| Xinjiang    | Meigang      | 116.8167 | 28.43333 | 7.2±0.40 | 780±203  | 2729±2709 |
| Yushanshui  | Shangrao     | 117.978  | 28.45    | 7.5±0.40 | 1136±255 | 2173±2561 |
| Changjiang  | Dufengkeng   | 117.2    | 29.26667 | 7.3±0.52 | 711±207  | 2281±2531 |
| Leanhe      | Xiangtun     | 117.5333 | 29       | 7.3±0.42 | 691±198  | 1935±2173 |
| Leanhe      | Hushan       | 117.2667 | 28.91667 | 7.3±0.42 | 807±271  | 2723±3209 |
| Xiushui     | Gaoshan      | 114.5833 | 29.049   | 7.4±0.35 | 792±174  | 2050±2169 |
| Xiushui     | Qiujin       | 115.6833 | 29.163   | 7.4±0.29 | 817±107  | 2082±1642 |
| Xiushui     | Baimadian    | 114.599  | 29.06667 | 7.5±0.35 | 709±132  | 1431±1557 |
| Xiushui     | Tuolin       | 115.5    | 30.442   | 7.3±0.36 | 776±201  | 2311±2584 |
| Liaoshui    | Wanjiabu     | 115.647  | 28.857   | 7.3±0.42 | 605±234  | 1962±2722 |
| Boyanghu    | Kangshan     | 116.4167 | 28.88333 | 7.3±0.54 | 539±156  | 2378±1445 |
| Boyanghu    | Tangyin      | 116.37   | 29.115   | 7.2±0.28 | 720±256  | 2454±1838 |
| Boyanghu    | Douchang     | 116.1833 | 29.244   | 7.4±0.35 | 683±267  | 1733±2153 |
| Ganjiangnan | Yelou        | 115.9667 | 28.73333 | 7.5±0.29 | 832±237  | 1394±1544 |
| Hukoushui   | Xingzi       | 116.05   | 29.429   | 7.4±0.32 | 772±297  | 1796±1841 |
| Hukoushui   | Hukou        | 116.2167 | 29.75    | 7.7±0.24 | 940±693  | 1338±707  |
| Fengshui    | Dayong       | 110.614  | 29.17    | 7.8±0.27 | 2323±395 | 2245±1763 |
| Lishui      | Shimen       | 111.378  | 29.95    | 7.5±0.19 | 2101±278 | 3673±1694 |
| Fengshui    | Sanjiangkou  | 111.307  | 29.578   | 7.9±0.26 | 2404±353 | 1710±2259 |
| Loushui     | Changtanhe   | 111.0167 | 29.46667 | 8.0±0.27 | 2309±389 | 1499±1228 |
| Weishui     | Dayanju      | 111.591  | 29.777   | 8.2±0.21 | 2393±311 | 881±420   |
| Songzihe    | Xinjiangkou  | 111.7833 | 30.18333 | 7.9±0.28 | 2422±406 | 1854±2138 |
| Songlihe    | Shiguishan   | 112      | 29.4     | 8.0±0.15 | 2353±161 | 1496±620  |
| Songhuhe    | Anxiang      | 112.1667 | 29.4     | 8.0±0.12 | 2646±367 | 1599±422  |
| Yuanjiang   | Jiegangkou   | 110.9838 | 28.79276 | 7.6±0.21 | 1999±309 | 3102±2350 |
| Xidongting  | Nanju        | 112.2833 | 29.06667 | 7.9±0.22 | 2291±345 | 1806±2259 |
| Xidongting  | Xiaoheju     | 112.3167 | 28.85    | 8.0±0.25 | 1744±249 | 1307±1127 |
| Miluohe     | Xinshi       | 112.883  | 28.827   | 7.3±0.28 | 659±193  | 2016±1406 |
| Miluohe     | Huangqiduan  | 113.3167 | 28.81667 | 6.9±0.24 | 524±167  | 4121±1976 |
| Dongtinghu  | Chenglingji  | 113.123  | 29.424   | 7.9±0.20 | 1895±248 | 1620±1811 |
| Xishaoxi    | Fanjiaocun   | 119.85   | 30.845   | 7.1±0.31 | 961±241  | 5314±3058 |
| Longxi      | Wuxing       | 120.089  | 30.896   | 7.0±0.23 | 1225±277 | 7261±2656 |
| Nancanghe   | Yixing       | 119.8333 | 31.358   | 7.5±0.26 | 1558±428 | 3052±2446 |
| Shaheshui   | Shahe        | 119.438  | 31.31667 | 7.5±0.16 | 1007±272 | 2240±1232 |
| Qinhuaihe   | Daluocun     | 118.8667 | 31.86667 | 7.4±0.21 | 1545±662 | 4078±2287 |
| Liuhe       | Liuhezha     | 121.2667 | 31.5     | 7.5±0.28 | 2407±508 | 5669±3363 |
| Guajinggang | Guajingkou   | 120.65   | 31.188   | 7.3±0.25 | 1199±291 | 3074±2643 |
| Hangjiaping | Jiaying      | 120.687  | 30.883   | 7.4±0.42 | 2088±410 | 4792±6599 |
| Wusongjiang | Huangdu      | 121.2333 | 31.253   | 7.6±0.19 | 3607±659 | 6064±2801 |
| Haiyanghe   | Xianrenzhang | 110.7    | 25.58333 | 7.4±0.18 | 2296±575 | 4688±2209 |
| Xinqianghe  | Taolin       | 113.4167 | 29.35    | 7.3±0.22 | 657±308  | 2152±1744 |
| Xinkaihe    | Suzhou       | 120.6052 | 31.371   | 7.4±0.35 | 1676±191 | 4325±3373 |
| Yuechenghe  | Wangting     | 120.4333 | 31.45    | 7.5±0.29 | 1425±184 | 2748±2393 |
| Baimaotang  | Changshu     | 120.737  | 31.615   | 7.5±0.17 | 2773±366 | 5150±2376 |
| Yangchenghu | Xiangcheng   | 120.782  | 31.48333 | 7.4±0.23 | 2189±227 | 4493±3339 |
| Taipuhe     | Pingwang     | 120.6333 | 31       | 7.4±0.25 | 1292±195 | 3322±2761 |

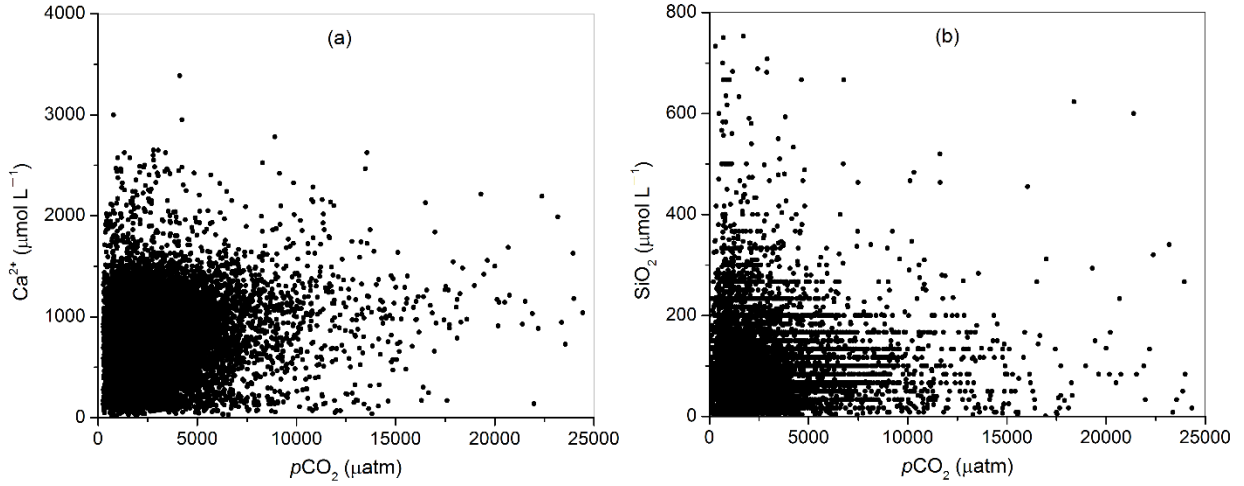

Figure S1. Relationship between (a)  $p\text{CO}_2$  and  $\text{Ca}^{2+}$  and (b)  $p\text{CO}_2$  and dissolved  $\text{SiO}_2$  in the Yangtze River basin using all available data pairs.

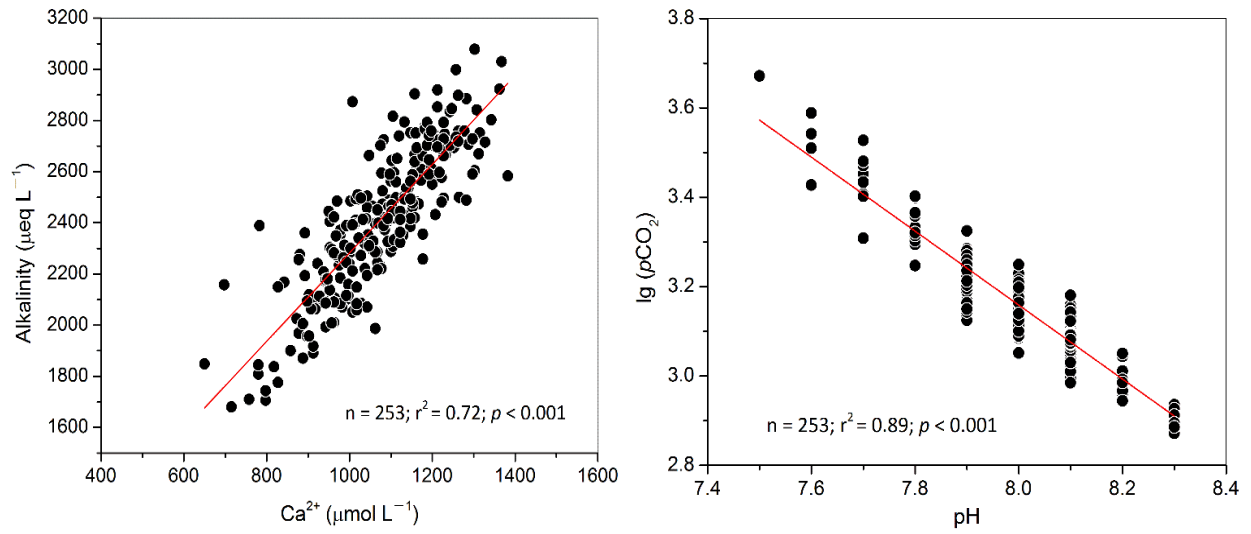

Figure S2. Relationship between (a)  $\text{Ca}^{2+}$  and alkalinity and (b) pH and  $p\text{CO}_2$  in Wujiang catchment (at Wulong station)



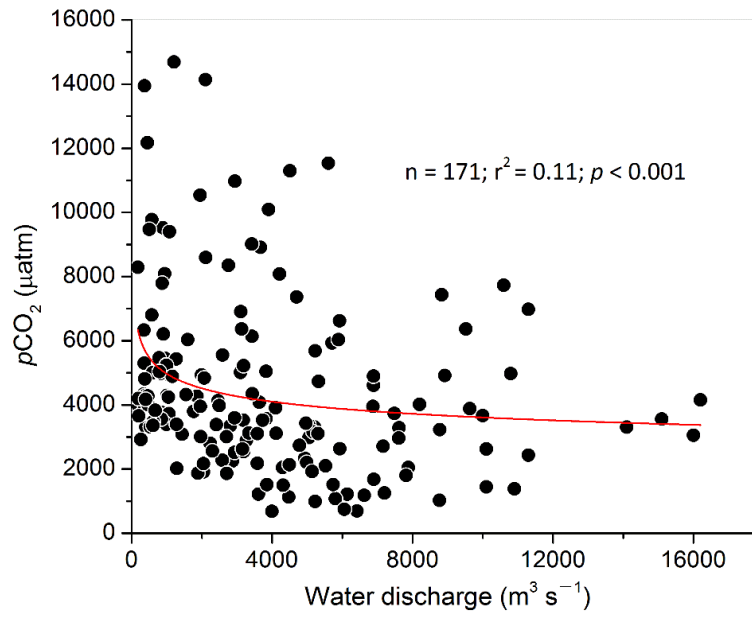

Figure S3. The negative relationship between water discharge and  $p\text{CO}_2$  at Xiajiang station (Ganjiang catchment).
