# Supplementary material for: Dynamics of riverine CO 2 in the Yangtze River fluvial network and theirimplications for carbon evasion
Source: Copernicus journal article supplement (doi:10.5194/bg-2016-507), 2016-12-12
Supplement: Supplementary file [file bg-2016-507-AC1-supplement.zip]

# Dynamics of riverine CO<sub>2</sub> in the Yangtze River fluvial network and their implications for carbon evasion

Lishan Ran<sup>1</sup>, Xi Xi Lu<sup>2, 3, \*</sup>, Shaoda Liu<sup>2</sup>

<sup>1</sup>Department of geography, the University of Hong Kong, Pokfulam Road, Hong Kong

<sup>2</sup>Department of geography, National University of Singapore, 117570, Singapore

<sup>3</sup>College of Environment & Resources, Inner Mongolia University, Hohhot, 010021, China

\*Correspondence: [geoluxx@nus.edu.sg](mailto:geoluxx@nus.edu.sg)

**Abstract:** Understanding riverine carbon dynamics is critical for not only better estimates of various carbon fluxes but also evaluating their significance in the global carbon budget. As an important pathway of global land-ocean carbon exchange, the Yangtze River has received less attention regarding its vertical carbon evasion compared with lateral transport. Using long-term water chemistry data, we calculated CO<sub>2</sub> partial pressure ( $p\text{CO}_2$ ) from pH and alkalinity and examined its spatial and temporal dynamics and the impacts of environmental settings. With alkalinity ranging from 415 to >3400  $\mu\text{eq L}^{-1}$ , the river waters were supersaturated with dissolved CO<sub>2</sub>, generally 2–20 folds the atmospheric equilibrium (i.e., 390  $\mu\text{atm}$ ). Changes of  $p\text{CO}_2$  were collectively controlled by carbon inputs from terrestrial ecosystems, hydrological regime, and rock weathering. High  $p\text{CO}_2$  values were observed spatially in catchments with abundant carbonate presence and seasonally in the wet season when recent-fixed organic matter was exported into the river network. In-stream processing of organic matter facilitated CO<sub>2</sub> production and sustained the high  $p\text{CO}_2$ , although the alkalinity presented an apparent dilution effect with water discharge. The decreasing  $p\text{CO}_2$  from the smallest headwater streams through tributaries to the mainstem channel illustrates the significance of direct terrestrial carbon inputs in controlling riverine CO<sub>2</sub>. With a basin-wide mean  $p\text{CO}_2$  of  $2662 \pm 1240$   $\mu\text{atm}$ , substantial CO<sub>2</sub>

evasion from the Yangtze River fluvial network is expected. Future research efforts are needed to quantify the amount of CO<sub>2</sub> evasion and assess its biogeochemical implications for watershed-scale carbon cycle. In view of the Yangtze River's relative importance in global carbon export, its CO<sub>2</sub> evasion would be significant for global carbon budget.

30 **Keywords:** CO<sub>2</sub> partial pressure ( $p\text{CO}_2$ ); riverine carbon cycle; spatial and temporal patterns; CO<sub>2</sub> evasion; Yangtze River

## 1. Introduction

Inland waters, including rivers, streams, lakes, wetland, and reservoirs, have recently been  
35 recognized as active components of the global carbon cycle, transporting, storing, and processing huge amounts of terrestrially-derived carbon (Aufdenkampe et al., 2011; Cole et al., 2007; Raymond et al., 2013; Richey et al., 2002; Weyhenmeyer et al., 2015; Borges et al., 2015). With a higher CO<sub>2</sub> partial pressure ( $p\text{CO}_2$ ) than the atmospheric equilibrium (i.e., 390  $\mu\text{atm}$ ), inland waters are mostly net carbon sources to the atmosphere. Published studies show that the  
40 annually degassed CO<sub>2</sub> from inland waters is estimated to almost entirely compensate the total annual carbon uptake by ocean systems (Wanninkhof et al., 2013; Regnier et al., 2013). Global estimates of CO<sub>2</sub> evasion from rivers and streams range from 0.56 to 1.8 PgC yr<sup>-1</sup> (Aufdenkampe et al., 2011; Raymond et al., 2013; Lauerwald et al., 2015). It is apparent that these results vary considerably and are associated with great uncertainties. The most recent estimate of 0.65 PgC  
45 yr<sup>-1</sup> by Lauerwald et al. (2015) accounts for only 36% of the efflux estimated by Raymond et al. (2013). While both studies have used the same hydrochemical database (GloRiCh), it should be

noted that Raymond et al. (2013) used all the calculated  $p\text{CO}_2$  values whereas Lauerwald et al. (2015) used only 18% of the sampling locations.

Among the numerous factors contributing to current  $\text{CO}_2$  evasion uncertainties, a principal reason is the absence of a spatially explicit  $p\text{CO}_2$  data set that covers the full spectrum of the global river and stream network.

Existing global maps of  $\text{CO}_2$  evasion from fluvial network are typically generated on the basis of incomplete spatial coverage of  $p\text{CO}_2$ , in which Asian rivers are heavily underrepresented (e.g., Aufdenkampe et al., 2011; Battin et al., 2009; Lauerwald et al., 2015; Raymond et al., 2013).

Due to lack of direct *in situ* measurements, simplified extrapolation is normally used to predict  $p\text{CO}_2$  in and  $\text{CO}_2$  evasion from Asian river systems. Consequently, the estimation accuracy is problematic and even erroneous. For example, for the Yellow River in East Asia, while the calculated  $p\text{CO}_2$  from river water chemistry is  $2800 \mu\text{atm}$  (Ran et al., 2015a), the modeled  $p\text{CO}_2$  by Lauerwald et al. (2015) is 30% lower (i.e.,  $<2000 \mu\text{atm}$ ). A much lower estimate of  $<700$

$\mu\text{atm}$  can be derived from the  $p\text{CO}_2$  map produced in Raymond et al. (2013). Such great discrepancies are largely because riverine  $p\text{CO}_2$  is highly site-specific and affected by a wide range of environmental factors (e.g., Abril et al. 2015; Teodoru et al., 2015).

Asian rivers are significant contributors to global carbon flux as a result of high soil erosion and particulate organic carbon export, accounting for 40% of the global carbon flux from land to sea (Schlünz

and Schneider, 2000; Hope et al., 1994). Estimating the amount of  $\text{CO}_2$  degassed from Asian rivers is critical for global  $\text{CO}_2$  evasion assessments. Recent work in Mekong and Yellow rivers has demonstrated high  $p\text{CO}_2$  and  $\text{CO}_2$  effluxes (Alin et al., 2011; Ran et al., 2015b), further

highlighting the necessity of incorporating the currently underrepresented Asian rivers into global carbon budget assessments.

70

As an important carbon contributor to the West Pacific Ocean, the Yangtze River has received widespread attention in fluvial carbon export at various spatial and temporal scales. Studies of flux estimates of different carbon species date back to the early 1980s (Cauwet and Mackenzie, 1993; Gan et al., 1983; Milliman et al., 1984; Wang et al., 2012; Zhang et al., 2014; Ittekkot, 1988).

75 Intensive observations covering seasonal variability show that the Yangtze River transports approximately 20 Mt of carbon per year into the oceans (Wu et al., 2007; Bao et al., 2015).

Contrary to the long history of lateral export measurements, however, few studies have examined the vertical carbon exchange between the river system and the atmosphere (Li et al., 2012; Zhao et al., 2013; Chen et al., 2008). This is by nature largely due to the differences in sampling

80 strategy. Unlike the lateral export that only involves measurements on the mainstem or at specific sites near the river mouth, quantifying basin-wide CO<sub>2</sub> evasion requires a spatially explicit *p*CO<sub>2</sub> data set encompassing the entire fluvial network. Any attempts of using limited local measurements to up-scale to the watershed scale are challenging and subject to large uncertainties. This has impacted the understanding of the riverine carbon cycle within the

85 Yangtze River watershed as well as its links to the atmosphere and ocean systems.

By using long-term water chemistry data measured in the Yangtze River watershed, we calculated the riverine *p*CO<sub>2</sub> from pH and alkalinity. In combination with hydrologic and

geologic information, the objectives of this study were to 1) investigate the spatial and temporal  
90 patterns of  $p\text{CO}_2$  under ‘natural’ processes before significant human perturbations, mainly dam  
impoundment and land-use change since the 1990s; 2) to explore the couplings between  $p\text{CO}_2$   
and environmental settings by investigating environmental and geomorphologic controls. Based  
on the obtained  $p\text{CO}_2$ , we further evaluated its implications for  $\text{CO}_2$  evasion. In view of the  
Yangtze River’s role in global fluvial export of water, sediment, and carbon (Syvitski et al.,  
95 2005; Wang et al., 2012), its contribution to the global  $\text{CO}_2$  evasion from river systems is likely  
significant. This  $p\text{CO}_2$  database is thus helpful to examine the spatial distribution of global  
riverine  $p\text{CO}_2$  and to refine estimates of global  $\text{CO}_2$  evasion.

## 2. Material and methods

### 100 2.1 The Yangtze River basin

With a length of 6380 km, the Yangtze River is the longest river in China and the third longest in  
the world. The river originates on the Tibetan Plateau and flows eastward through the Sichuan  
Basin and the Middle-Lower Reach Plains, before emptying into the East China Sea (Fig. 1a). Its  
drainage area is 1.81 million  $\text{km}^2$ . The Yangtze River basin is mainly overlain by sedimentary  
105 rocks that are composed of marine carbonates, evaporites, and continental deposits. Carbonate  
sedimentary rocks are widely distributed within the watershed and are particularly abundant in  
the Wujiang, Yuanjiang, and Hanjiang tributary catchments (Fig. 1b). Siliciclastic sedimentary  
rocks are also widely present in the basin while metamorphic rocks are mainly scattered in the  
middle-lower reach (Fig. 1b). The Yangtze River is joined by a number of large tributaries,

including the Yalongjiang, Daduhe, Minjiang, Jialingjiang, Wujiang, Yuanjiang, Xiangjiang, Hanjiang, and Ganjiang rivers (Fig. 1a).

### Figure 1

Except the headwater region characterized by high elevation and cold climate (annual mean temperature  $<4^{\circ}\text{C}$ ), the remaining watershed is affected by a subtropical monsoon climate with the annual mean temperature in the middle-lower reach varying from 16 to  $18^{\circ}\text{C}$  (Chen et al., 2002). Rainfall is the major source of water discharge, whereas snowfall supply is only significant in the ice-covered upstream mountainous areas. With a mean precipitation of  $1100\text{ mm yr}^{-1}$ , the precipitation is spatially highly variable, decreasing from  $1644\text{ mm yr}^{-1}$  in the lower reach, to  $1396\text{ mm yr}^{-1}$  in the middle reach, and  $435\text{ mm yr}^{-1}$  in the upper reach (Chetelat et al., 2008). Approximately 60% of the annual precipitation falls during the wet season from June to September. Affected by summer monsoon, the wet season generally occurs earlier in the middle and lower reaches than in the inland upper reach. Water discharge from the upper to the lower reach presents a strong seasonal variability (Fig. 2). Monthly peak discharge occurs in July and can be 5–7 times greater than the lowest discharge in the dry season (October to May). The mean discharge at Datong station is  $28,200\text{ m}^3\text{ s}^{-1}$  (see its location in Fig. 3b), and consequently the Yangtze River annually discharges  $889\text{ km}^3$  of water into the ocean (Yang et al., 2002).

### Figure 2

#### 2.2 Water chemistry data

Concentrations of alkalinity, major ions, and dissolved silica measured at 359 stations in the Yangtze River watershed (Fig. 1a) during the period 1960s–1985 were retrieved from the

Hydrological Yearbooks, which were yearly produced by the Yangtze River Conservancy Commission (YRCC) for internal use. Concomitant environmental variables measured at each sampling event, including pH, water temperature, and discharge, were also extracted from the yearbooks. The water samples for pH and temperature measurement were taken in the same period as these for ion analysis. The sampling frequency ranged from 1 to 14 times per month depending on flow conditions. While sampling at some stations during 1966–1975 was less frequent, ~80% of the 359 stations have been continuously sampled for at least 10 years, starting from the early 1970s. To avoid severe river pollution by human activity, only the samples collected prior to 1985 were used. In addition, samples with a pH lower than 6.5 were manually discarded (498 measurements; predominantly in the lower reach) because the calculated  $p\text{CO}_2$  would be greatly biased due to contributions of noncarbonated alkalinity such as organic acid anions (Abril et al., 2015; Hunt et al., 2011). Because reservoir trapping and increased water residence time can remarkably alter the physical and biogeochemical properties of running water (Kemenes et al., 2011; Barros et al., 2011), the stations located inside or shortly below reservoirs were also intentionally removed. Given the tidal influences, mainstem stations downstream of Datong, 626 km inland from the coast, were also excluded, as were the stations in the delta region that were affected either by tides or by intersections with other rivers via artificial canals. Based on these selection criteria, 339 stations, including 13 mainstem stations and 326 tributary stations, were retained and 47,809 water chemistry measurements in total were compiled. The discarded samples due to  $\text{pH} < 6.5$  accounted for approximately 1% of the considered measurements. No sampling station was excluded solely because it had  $\text{pH} < 6.5$  samples only.

Chemical analyses of water samples were performed under the authority of YRCC following the standard procedures and protocols described by Alekin et al. (1973) and the American Public Health Association (1985). While pH and temperature were measured in the field, the alkalinity was determined by acid titration. Detailed sampling and analysis procedures were presented in Chen et al. (2002). One important issue regarding historical records is data reliability. No assessment reports on quality assurance and quality control are available in the hydrological yearbooks. An effective evaluation approach is to compare the hydro-chemical differences for samples collected at the same station but by different agencies. The Wuhan station on the Yangtze mainstem has also been monitored under the United Nations GEMS/Water Programme since 1980 (only yearly means available at <http://www.unep.org/gemswater>). The pH value from the yearbooks agreed well with that measured by the GEMS/Water Programme with <1.8% differences, while the alkalinity discrepancy between the two data sets is larger (Table 1). The yearbooks report a slightly higher alkalinity than the GEMS/Water Programme results by 7.6–13.9%, indicating that the yearbook reports are reliable for  $p\text{CO}_2$  calculation. High data quality of the yearbook reports can also be validated from comparison of major dissolved elements measured by the two agencies at Wuhan station (see Chen et al., 2002).

**Table 1**

### **2.3 Calculation of $p\text{CO}_2$**

The conventional method of calculating  $p\text{CO}_2$  from pH and alkalinity was used. With ~90% of the pH values ranging from 7.1 to 8.3 suggestive of natural process for the Yangtze River,



bicarbonates were assumed equivalent to alkalinity (Amiotte-Suchet et al., 2003), accounting for 96% of the total alkalinity. As a result of low dissolved organic carbon (i.e.,  $<250\ \mu\text{M}$ ; Liu et al., 2016), impact of organic acids on alkalinity is predicted to be small. The  $p\text{CO}_2$  was then calculated using CO2SYS program (Lewis and Wallace, 1998). However, using this method would produce biased extreme values that are unrealistic in natural river systems (Hunt et al., 2011; Weyhenmeyer et al., 2015). We thus reported median values per sampling station instead of means to avoid the impact of erroneous extreme results. The results were summarized in the Supplement (Table S1).

### 3. Results

#### 3.1 Spatio-temporal variability of alkalinity and $p\text{CO}_2$

Except the excluded measurements, pH in the Yangtze River waters varied from 6.5 to 9.2 with 96% of the pH measurements ranging from 7.3 to 8.3 (Table 2). Higher pH values (i.e.,  $>7.8$ ) were spatially measured in the headwater streams and the Hanjiang catchments (see Fig. 1a for location). In comparison, the tributaries in the southern part of the watershed exhibited relatively low pH values. For the mainstem channel (Table 2), the median pH showed a significant downstream decrease from 8.29 to 7.55 ( $r^2 = 0.77$ ;  $p < 0.001$ ). The alkalinity varied from 415 to  $>3400\ \mu\text{eq L}^{-1}$  (Fig. 3a). Higher alkalinity (i.e.,  $>2500\ \mu\text{eq L}^{-1}$ ) was observed in the upper reach and the upper part of the middle reach (Fig. 3a), in particular the carbonate-rich tributary catchments (e.g., the Jialingjiang, Wujiang, and Hanjiang rivers). In contrast, the lower part of

the middle reach (mainly the Ganjiang River) and the lower reach showed a lower alkalinity of  $<2000 \mu\text{eq L}^{-1}$ . The average alkalinity over the whole watershed was  $2210 \pm 1023 \mu\text{eq L}^{-1}$ .

### Figure 3 and Table 2

The calculated  $p\text{CO}_2$  varied by a magnitude of 2 with the highest  $p\text{CO}_2$  being  $24,432 \mu\text{atm}$ . At 95% of the stations, the  $p\text{CO}_2$  was higher than  $1000 \mu\text{atm}$ , generally 2–20 folds the atmospheric  $p\text{CO}_2$ . Only one station in the upper reach showed a median  $p\text{CO}_2$  lower than the atmosphere. In the mainstem, the  $p\text{CO}_2$  increased from  $\sim 700 \mu\text{atm}$  at the uppermost station to  $3800 \mu\text{atm}$  at Nanjing near the river mouth (Table 2). Averaged over all stations, the basin-wide  $p\text{CO}_2$  was  $2662 \pm 1240 \mu\text{atm}$ . To better illustrate its spatial variability, we modeled the  $p\text{CO}_2$  for the whole stream network using the Kriging interpolation method in ArcGIS 10.1 (Esri, USA) with the assumption that the station-based  $p\text{CO}_2$  was representative of the surrounding streams. Similar to alkalinity, the  $p\text{CO}_2$  presented significant spatial variations (Fig. 3b). The Yangtze mainstem near the headwater region and the Yalongjiang catchment showed the lowest  $p\text{CO}_2$ , generally  $<1000 \mu\text{atm}$ . In comparison, the carbonate-rich tributaries in the southern part of the watershed had high  $p\text{CO}_2$  values. With carbonates occupying 83% of the catchment, the Wujiang River presented the highest median  $p\text{CO}_2$  than other tributaries, averaging  $3550 \pm 1356 \mu\text{atm}$ . In the lower reach, the  $p\text{CO}_2$  was  $3988 \pm 1244 \mu\text{atm}$  on average, which is inconsistent with its relatively low alkalinity of  $<2000 \mu\text{eq L}^{-1}$  (Fig. 3a). It is worth noting that the  $p\text{CO}_2$  in Hanjiang catchment was lower than expected, given its high alkalinity ( $>2500 \mu\text{eq L}^{-1}$ ). Differences in pH in these catchments are likely a principal cause of these inconsistencies.

In addition, the  $p\text{CO}_2$  also showed strong temporal variability. Fig. 4 presents an example of  $p\text{CO}_2$  changes at Datong station on the mainstem channel. Despite considerable inter-annual variations that could change by a factor of 5, the annual  $p\text{CO}_2$  declined steadily during the >20-year-long sampling period ( $r^2 = 0.18$ ;  $p < 0.05$ ) (Fig. 4a). This trend is pronounced even if the anomalously high values in the late 1960s are excluded. Indeed, more than half of the evaluated stations, mainly in the middle-lower reach, showed a significant decreasing trend at the 95% confidence level. In contrast, gradual increases were observed at some tributary stations in the upper reaches. Seasonally, the  $p\text{CO}_2$  in the wet season was on average 30% higher than that in the dry season (Fig. 4b), and greater fluctuation ranges could be observed in the wet season.

#### Figure 4

### 3.2 Correlations with hydro-geochemical variables

Fig. 5 presents two representative examples showing responses of alkalinity and  $p\text{CO}_2$  to hydrological regimes. Changes of alkalinity at both stations reflected a clear dilution effect. High alkalinity concentrations were measured in low flow periods when groundwater was the major contributor to runoff (Figs. 5a and 5c). Checking all stations indicated that the alkalinity at 98% of the stations decreased exponentially with increasing water discharge after the onset of the wet season. In contrast, the  $p\text{CO}_2$  presented diverse relationships with water changes (Figs. 5b and 5d). There was no discernible dependence of  $p\text{CO}_2$  on flow in the mainstem, while a positive correlation was widely observed in small tributaries. Although only two stations were plotted

here, these diverse responses of alkalinity and  $p\text{CO}_2$  to flow changes were widespread within the watershed, in particular for  $p\text{CO}_2$  between mainstem and small tributaries.

### Figure 5

In order to elucidate the impacts of rock weathering on  $p\text{CO}_2$ , we selected three typical tributary catchments with differing rock compositions (Table 3). The Wujiang catchment is mainly underlain by carbonate sedimentary rocks (83%) and the Ganjiang catchment by siliciclastic sedimentary rocks (65%), whereas the Jialingjiang catchment lies in the middle regarding the areal coverage of the two rocks (Table 3 and Fig. 1b). As the most typical weathering products of carbonate and siliciclastic sedimentary rocks, we plotted  $\text{Ca}^{2+}$  and dissolved silica (expressed as  $\text{SiO}_2$ ) against  $p\text{CO}_2$ , respectively (Fig. 6). For the three catchments with contrasting rock compositions, the  $p\text{CO}_2$  showed different responses to  $\text{Ca}^{2+}$  and  $\text{SiO}_2$ . In Wujiang catchment, the log-transformed  $p\text{CO}_2$  (i.e.,  $\lg(p\text{CO}_2)$ ) presented a significant negative correlation with  $\text{Ca}^{2+}$  concentration ( $p < 0.001$ ) (Fig. 6). This negative correlation became less apparent with decreasing carbonate coverage in Jialingjiang and Ganjiang catchments. In contrast, while the  $\lg(p\text{CO}_2)$  exhibited a positive correlation with  $\text{SiO}_2$  in Jialingjiang and Ganjiang catchments characterized by high coverage of siliciclastic sedimentary rocks, no clear relation between  $\lg(p\text{CO}_2)$  and  $\text{SiO}_2$  was detected in Wujiang catchment (Fig. 6). However, when plotting  $p\text{CO}_2$  against  $\text{Ca}^{2+}$  and  $\text{SiO}_2$  for the entire Yangtze River watershed, there was no discernable relationship between  $p\text{CO}_2$  and both variables (Fig. S1 in the Supplement).

### Figure 6 and Table 3

## 4. Discussion

#### 4.1 Uncertainty analysis of $p\text{CO}_2$

255 As an important parameter for  $\text{CO}_2$  evasion estimation, an accurate riverine  $p\text{CO}_2$  is essential to quantify  $\text{CO}_2$  evasion and explore its biogeochemical implications for carbon cycle at different scales. Compared with direct measurement by means of membrane equilibration or headspace technique, the conventional  $p\text{CO}_2$  calculation from alkalinity has been criticized for causing biases (Long et al., 2015; Hunt et al., 2011). Huge overestimations (i.e., >100%) have been  
260 reported in rivers with organic-rich and acidic waters due to combined effects of high organic acids and low buffering capacity of carbonate systems at low pH (Abril et al., 2015).

Unfortunately, there were no organic carbon information in the yearbooks, and measurements of dissolved organic carbon (DOC) in the Yangtze River started in the early 1980s. Its DOC ranging from 130 to 180  $\mu\text{M}$  was relatively low compared with other major world rivers (Bao et  
265 al., 2015; Wang et al., 2012). Our recent sampling also shows that the mean DOC is 160  $\mu\text{M}$  for the mainstem and 200  $\mu\text{M}$  for major tributaries (Liu et al., 2016). Given the neutral to basic pH range and the alkalinity variations, we believe the impact of organic acids is minimal, although a slight overestimation may have occurred as suggested by Abril et al. (2015). Our recent  $p\text{CO}_2$  measurements in the mainstem and major tributaries using a membrane contactor (Qubit  $\text{DCO}_2$   
270 System, Qubit Biology Inc., Canada) also indicate that the calculated  $p\text{CO}_2$  results are consistent with the measured values with only ~8% differences (Liu et al., 2016).

Furthermore, this  $p\text{CO}_2$  calculation method is sensitive to pH changes. High accuracy of pH measurements is critical to reduce the associated uncertainty. Similar to other water chemistry

records (i.e., Butman and Raymond, 2011; Lauerwald et al., 2015; Weyhenmeyer et al., 2015), the retrieved pH was reported with a precision of one decimal place. If the uncertainties in pH measurement accuracy are assumed to 0.1 pH units, the calculated  $p\text{CO}_2$  would be underestimated by 26% or overestimated by 21%. To minimize human-induced disturbances in the chemical equilibrium of natural waters, we excluded the samples with  $\text{pH} < 6.5$  and treated them as being significantly polluted. This arbitrary exclusion may have generated biased estimates of  $p\text{CO}_2$  for the whole river network in general and some natural rivers characteristic of low pH in particular (Wallin et al., 2014). Considering the higher alkalinity than the GEMS/Water Programme results, the propagated uncertainty ranges from 14% (underestimation) to 27% (overestimation). As China's major industrial and agricultural regions, impact of human activity within the catchment, including sewage inputs and chemical fertilizer usage to a lesser extent, may have altered its chemical compositions and pH. In view of the small number of discarded measurements (1% of the total) and the high buffering capacity of carbonate alkalinity and low DOC contents, the calculated  $p\text{CO}_2$  is reasonable and can be used for further  $\text{CO}_2$  evasion estimation.

#### 4.2 Environmental impacts on alkalinity and $p\text{CO}_2$

Export of alkalinity in river systems was affected by hydrological regime with a clear dilution effect (Fig. 5). The average alkalinity was 35% lower in the wet season than in the dry season. In both the mainstem and the tributaries, the higher alkalinity during low flow periods in the dry season (Figs. 5a and 5c) illustrated the contribution of groundwater recharge in providing

abundant alkalinity. With widespread carbonate presence, groundwater in the Yangtze River watershed was rich in dissolved inorganic carbon (DIC). Recent studies show that the alkalinity of typical karst groundwater in the watershed is in the range of 3300–4200  $\mu\text{eq L}^{-1}$  (Li et al., 2010b; Li et al., 2010a). With reduced relative contribution of groundwater in the wet season, the high alkalinity was diluted by local rain events that carried lower DIC contents. Spatially, the dilution effect was more pronounced in the upper reach than the middle-lower reach. This may have revealed the response of alkalinity production to land cover. Catchments with a higher forest cover normally exhibit a stronger dilution effect than cropland catchments (Raymond and Cole, 2003). While cropland was the major land use type in the middle-lower reach accounting for 53.5% of the total catchment area, forest cover in the upper Yangtze River watershed was much higher (37.3%) than the middle-lower reach (30.4%; data are from Data Center for Resources and Environmental Sciences for the 1980s).

Riverine dissolved  $\text{CO}_2$  originates primarily from terrestrial ecosystem respiration, groundwater input, and in-stream processing of land-derived organic matter (Wallin et al., 2013; Lynch et al., 2010). Different from alkalinity showing a clear dilution effect, the stable  $p\text{CO}_2$  in the Yangtze mainstem likely reflected the impact of different biogeochemical processes (Fig. 5b). Compared to the dry season in which the  $p\text{CO}_2$  was mainly controlled by DIC inputs from groundwater, the elevated  $p\text{CO}_2$  in the wet season suggested the influence of organic carbon transport and decomposition. Owing to strong erosion and leaching of recent-fixed organic matter, its organic carbon content in the wet season is significantly higher and the age much younger (Wang et al.,

2012;Zhang et al., 2014). Rapid mineralization of the labile fraction of organic carbon can increase the  $p\text{CO}_2$ . For instance, approximately 60% of the recent-fixed carbon entering the Yangtze River can be quickly degraded in the wet season, while the degradation ratio in the dry  
320 season is only 31% (Wang et al., 2012). On the other hand, the increasing  $p\text{CO}_2$  with flow in tributaries indicated enhanced supply of fresh dissolved  $\text{CO}_2$  during high flow periods (Fig. 5d). For tributaries with more homogeneous catchment environments, decomposition of soil organic matter can provide abundant dissolved  $\text{CO}_2$  (Liu et al., 2016;Li et al., 2012), generating a positive  $p\text{CO}_2$  response to flow changes. Presence of wetlands and floodplains also affects river  
325 biogeochemistry (Teodoru et al., 2015). Affected by dam impoundment, the catchment upstream of Yunxian station is characteristic of widespread wetlands and floodplains. Consequently, the enhanced connectivity between river and wetlands/floodplains along aquatic continuum, especially during wet seasons, may have maintained the high  $p\text{CO}_2$  levels (Abril et al., 2014). For  $p\text{CO}_2$  in the mainstem, it is likely because the increased dissolved  $\text{CO}_2$  inputs by soil organic  
330 matter decomposition from one region has been counteracted by low  $p\text{CO}_2$  waters derived from other regions. This is highly possible given the heterogeneous catchment setting in terms of vegetation cover, soil type, and rainfall intensity. Furthermore, the large catchment implies a long travel time of land-derived organic carbon during fluvial delivery (3–5 months). Coupled with limited floodplains along the mainstem channel (see discussion below), direct inputs of  $\text{CO}_2$   
335 from soil respiration would be relatively low whereas strong  $\text{CO}_2$  evasion in lower-order turbulent tributaries might have already exhausted dissolved  $\text{CO}_2$ . Therefore, its  $p\text{CO}_2$  dynamics appeared to be independent of hydrograph.



The spatial distribution of alkalinity overlapped well with the outcrops of carbonate sedimentary rocks (Figs. 1b and 3a), with ~60% of the high alkalinity concentrations measured in carbonate catchments. Using  $\text{Ca}^{2+}$  as a proxy of rock weathering, the strong correlation between  $\text{Ca}^{2+}$  and alkalinity suggested the dominant role of weathering in controlling alkalinity and DIC export (Fig. 7). This is consistent with the significant impact of weathering on alkalinity as observed in other rivers (Raymond and Cole, 2003; Humborg et al., 2010). Particularly, given the higher susceptibility of carbonates to weathering than silicates (Goudie and Viles, 2012), the abundant carbonate presence in Wujiang catchment helped to sustain its high alkalinity and  $p\text{CO}_2$  (Table 3). However, the negative correlation in Fig. 6a is contradictory to the common belief that carbonate dissolution will likely cause an elevated  $p\text{CO}_2$  (Marcé et al., 2015; Teodoru et al., 2015). Given the significant correlation between  $\text{Ca}^{2+}$  and alkalinity, the decreasing  $p\text{CO}_2$  with increasing  $\text{Ca}^{2+}$  is probably due to pH variability that may have offset the impact of weathering-induced DIC inputs in controlling  $p\text{CO}_2$  (Fig. S2). A slight pH increase would result in a reduced  $p\text{CO}_2$  as this calculation method is sensitive to pH fluctuations (Laruelle et al., 2013). The positive correlation between  $p\text{CO}_2$  and  $\text{SiO}_2$  in Jialingjiang and Ganjiang catchments demonstrated the impact of DIC export by silicate weathering. Despite the high silicate weathering rate in Ganjiang catchment, its alkalinity represented only one third of that in the other two catchments (Table 3). Apparently, its high  $p\text{CO}_2$  of  $2642 \pm 626 \mu\text{atm}$  was primarily due to its low pH (~6% lower). Overall, the catchments with more carbonate presence presented higher  $p\text{CO}_2$  values (Figs. 1 and 3b). Because weathering products are typical for groundwater,

this also suggests that riverine  $p\text{CO}_2$  has a strong groundwater signature. Different from the positive response of  $p\text{CO}_2$  to discharge at Yunxian station reflecting the importance of connectivity between river and wetlands/floodplains (Fig. 5d), the decreasing  $p\text{CO}_2$  at Xiajiang station with discharge is indicative of the impact of groundwater input on riverine carbon dynamics (Figs. S3 and 6f). Particularly, in dry seasons with groundwater dominating the runoff, the  $\text{SiO}_2$  can explain ~25% of the  $p\text{CO}_2$  variability in the sub-catchments covered mainly with siliciclastic sediment rocks, comparable to the results by Humborg et al. (2010) in Sweden. The indiscernible  $p\text{CO}_2\text{-Ca}^{2+}$  and  $p\text{CO}_2\text{-SiO}_2$  relationship for the entire watershed may be attributed to the spatial heterogeneity in lithology that has obscured the signature (Fig. S1). While both positive and negative relationships existed in sub-catchments with predominant carbonate or siliciclastic sediment rocks (Fig. 6), these relationships may have counteracted each other when all data points were plotted together.

### Figure 7

Because  $p\text{CO}_2$  was calculated from alkalinity, its spatial variability reflected largely the export of the latter. The inconsistencies between  $p\text{CO}_2$  and alkalinity in Hanjiang catchment were likely caused by dam operation (Fig. 3). By altering the physical and biogeochemical properties of flowing water, dam trapping could cause a greatly declined  $p\text{CO}_2$  as a result of photosynthetic  $\text{CO}_2$  fixation and increased pH (Ran et al., 2015a). The Danjiangkou Reservoir (storage: 17.5  $\text{km}^3$ ) on the upper Hanjiang River was constructed in 1968. Unfortunately, the retrieved data for the Hanjiang River started from the 1970s, rendering it impossible to compare the  $p\text{CO}_2$  differences between pre- and post-dam periods. An indirect evidence is that an elevated pH

within the reservoir has been measured (7.95–8.33; Li et al., 2009) relative to the 1970s (7.84±0.15). In the lower reach near the estuary (Fig. 3b), more pronounced net-heterotrophy and human activity could explain its high  $p\text{CO}_2$ . Settling down of particulate organic matter coupled with nutrient-rich water plume from offshore can accelerate  $\text{CO}_2$  production. Chen et al. (2008) concluded that aerobic respiration of heterotrophic ecosystems was the primary determinant of the high  $p\text{CO}_2$  in the inner Yangtze estuary. Moreover, the lower Yangtze River watershed was highly populated. Inputs of acids from agricultural fertilizer, sewage, and acid deposition have also decreased pH and shifted the carbonate system towards  $\text{CO}_2$  (Duan et al., 2007; Chen et al., 2002), generating high  $p\text{CO}_2$  values regardless of its relatively low alkalinity.

#### 4.3 Geomorphological controls on alkalinity and $p\text{CO}_2$

To illustrate the geomorphological controls, the used 339 stations were aggregated by stream order based on their spatial positions. Both alkalinity and  $p\text{CO}_2$  showed a decreasing trend from the smallest headwater streams through tributaries to the Yangtze mainstem (Fig. 8). The average decrease of alkalinity and  $p\text{CO}_2$  were 94  $\mu\text{eq L}^{-1}$  and 266  $\mu\text{atm}$ , respectively. Higher alkalinity and  $p\text{CO}_2$  in the headwater streams reveal the significance of direct terrestrial inputs of organic carbon and dissolved  $\text{CO}_2$  in controlling riverine carbon cycle. Over the study period, the Yangtze River watershed suffered severe soil erosion, averaging 2167  $\text{t km}^{-2} \text{ yr}^{-1}$  (Wang et al., 2007b). Huge amounts of carbon were transported into the river system via erosion (Wu et al., 2007). Decomposition of the terrestrial-origin organic carbon has resulted in the  $\text{CO}_2$  excess in the headwater streams (Li et al., 2012).

### Figure 8

The decreasing  $p\text{CO}_2$  with increasing stream order imply continued  $\text{CO}_2$  evasion along the river continuum and reduced supply of fresh  $\text{CO}_2$ . Except the three lakes connected to the mainstem (Fig. 1a), the Yangtze River network is largely confined to its channel. Without large floodplains supplying labile organic matter to sustain high  $p\text{CO}_2$  as in the Amazon River (Mayorga et al., 2005), its  $p\text{CO}_2$  decreased progressively from the headwaters towards the mainstem channel. In addition, it is interesting to note that the  $p\text{CO}_2$  in the highest three orders was equivalent ( $\sim 1800 \mu\text{atm}$ ; Fig. 8). Instead of continuous decline, the stable  $p\text{CO}_2$  suggests a balance between  $\text{CO}_2$  evasion and supply of fresh  $\text{CO}_2$  from upstream catchments or aquatic respiration. Contrary to the headwater streams with close contact with terrestrial ecosystems, the downstream large streams and rivers are far away from rapid fresh  $\text{CO}_2$  input. Moreover, these large streams and rivers are generally characterized by comparatively low gas transfer velocities owing to weakened turbulence and mixing with benthic substrates (Butman and Raymond, 2011; Borges et al., 2015), which can effectively inhibit  $\text{CO}_2$  degassing and therefore maintain the balance.

It is important to note, however, that the delineated 8 stream orders may not necessarily represent the actual stream network. Limited by spatial resolution, the smallest headwater streams might have been missed from the identified river network. In addition, these headwater streams are also generally absent of sampling stations. With much closer biogeochemical interactions with land ecosystems, these missed headwater streams tend to have higher  $p\text{CO}_2$  (Benstead and Leigh,

2012;Aufdenkampe et al., 2011;Butman and Raymond, 2011). Thus, the actual  $p\text{CO}_2$  gradient along the stream order may be sharper if a higher  $p\text{CO}_2$  in the headwater streams is included.

#### 4.4 Implications for riverine $\text{CO}_2$ evasion

425 As mentioned earlier, riverine carbon transport has been a significant component of carbon cycle. Quantifying riverine carbon export is essential to better evaluate global carbon budget and elucidate the magnitude of carbon exchange between different carbon pools. For the estimation of  $\text{CO}_2$  evasion, riverine  $p\text{CO}_2$  denotes  $\text{CO}_2$  concentration gradient across the water-air interface and thus the potential of  $\text{CO}_2$  exchange. Prior studies indicate that elevated riverine  $p\text{CO}_2$  can  
430 enhance  $\text{CO}_2$  evasion due to a steeper concentration gradient and a greater  $\text{CO}_2$  availability for degassing (Long et al., 2015;Billett and Moore, 2008). When assessing global-scale  $\text{CO}_2$  evasion, however, the spatial distribution of  $p\text{CO}_2$  is heavily skewed towards Northern America, Europe, and Australia (e.g., Lauerwald et al., 2015; Raymond et al., 2013), while data for Asian rivers are extremely lacking. This absence of an equally distributed  $p\text{CO}_2$  database has made it challenging  
435 to accurately estimate global  $\text{CO}_2$  evasion. The role of Asian rivers in global carbon export explicitly demonstrates that under-representation of Asian rivers would cause huge biases.

Comparing the Yangtze River with other rivers shows that its  $p\text{CO}_2$  is higher than most world rivers (Table 4). The average  $p\text{CO}_2$  of 2662  $\mu\text{atm}$  suggests that the Yangtze River waters are  
440 potentially a prominent carbon source for the atmosphere. Large  $\text{CO}_2$  evasion fluxes have been reported by several small-scale studies in the upper reach and the estuary (Zhai et al., 2007;Chen

et al., 2008;Li et al., 2012), as also shown in Table 4. Nonetheless, a systematic estimation of CO<sub>2</sub> evasion from the whole Yangtze River network, including mainstem and its tributaries of all orders, remains lacking. This has further hampered the assessment of its CO<sub>2</sub> evasion in a wider context linking the watershed's land-atmosphere and land-ocean carbon exchanges.

#### Table 4

Accelerated human activity is another urgent issue to be considered when investigating its riverine *p*CO<sub>2</sub> and CO<sub>2</sub> evasion. Approximately 50,000 dams, including the world's largest reservoir (i.e., the Three Gorges Reservoir; TGR), have been constructed in recent decades (Xu and Milliman, 2009). Assessing the impacts of dam-triggered changes to flow regime and biogeochemical processes on *p*CO<sub>2</sub> and CO<sub>2</sub> evasion is particularly important for deeper insights into its riverine carbon cycle (Table 4). For example, while the *p*CO<sub>2</sub> at Datong station declined continuously before the TGR impoundment (Fig. 4a; Wang et al., 2007a), our recent field survey shows that it has recovered from 1440 µatm in the 1980s to present 1700 µatm (see Fig. 4a). As for CO<sub>2</sub> degassing, recent work in the TGR indicates that its CO<sub>2</sub> evasion fluxes are different from natural rivers and are higher than other temperate reservoirs (Table 4; Zhao et al., 2013). Future research efforts are warranted to conduct systematic monitoring and evasion estimation. Given the Yangtze River's role in global carbon export, a comprehensive assessment of CO<sub>2</sub> evasion is also meaningful for global carbon budget.

#### Conclusions

By using long-term water chemistry data measured in the Yangtze River watershed during the period 1960s–1985, we calculated its  $p\text{CO}_2$  from pH and alkalinity. The pH in the Yangtze River waters varied from 6.5 to 9.2 and the alkalinity ranged from 415 to >3400  $\mu\text{eq L}^{-1}$  with high alkalinity concentrations occurring in carbonate-rich tributary catchments. Except one station in the upper reach showing a lower  $p\text{CO}_2$  than the atmosphere, the Yangtze River waters were supersaturated with dissolved  $\text{CO}_2$ , generally 2–20 folds the atmospheric equilibrium. Averaged over all stations, the basin-wide  $p\text{CO}_2$  was  $2662 \pm 1240 \mu\text{atm}$ . As an important parameter for  $\text{CO}_2$  evasion estimation, its  $p\text{CO}_2$  was characterized by significant spatial and temporal variability, which was collectively controlled by carbon inputs from terrestrial ecosystems, hydrological regime, and rock weathering. High  $p\text{CO}_2$  values were observed spatially in catchments with abundant carbonate presence and seasonally in the wet season when recent-fixed organic matter was flushed into the river network. Decomposition of organic matter by microbial activity in aquatic systems facilitated  $\text{CO}_2$  production and sustained the high  $p\text{CO}_2$  values in the wet season, although the alkalinity presented a significant dilution effect with water discharge. In addition, the  $p\text{CO}_2$  decreased with increasing stream orders from the smallest headwater streams through tributaries to the mainstem channel. A higher  $p\text{CO}_2$  in the headwater streams illustrated the influence of direct inputs of terrestrially-derived organic matter and weathering products via erosion and flushing on riverine carbon dynamics.

The substantially higher  $p\text{CO}_2$  than the atmosphere indicated a potential of significant  $\text{CO}_2$  emissions from the Yangtze River fluvial network. Quantifying the amount of  $\text{CO}_2$  evasion

should be a top priority, upon which its biogeochemical implications for watershed-scale carbon cycle can be assessed in association with carbon burial and downstream export. Given the

485 extensive and intensive human disturbances within the watershed since the 1990s, special attention must be paid to the resulting changes to riverine  $p\text{CO}_2$  and  $\text{CO}_2$  evasion. A comparative analysis involving  $\text{CO}_2$  evasion before large-scale human impacts and recent degassing estimates (e.g., Li et al., 2012; Liu et al., 2016) will be able to examine the anthropogenic perturbations of the river-atmosphere  $\text{CO}_2$  fluxes due to damming and land-use change. Considering the Yangtze  
490 River's relevance to global carbon export, quantifying its  $\text{CO}_2$  evasion is also of paramount importance for better assessments of global carbon budget.

**Acknowledgements:** This work was financially supported by the National University of Singapore (grant no: R-109-000-172-646) and the University of Hong Kong (grant no:  
495 201612159004).

## References

- Abril, G., Martinez, J.-M., Artigas, L. F., Moreira-Turcq, P., Benedetti, M. F., Vidal, L., Meziane, T., Kim, J.-H., Bernardes, M. C., and Savoye, N.: Amazon River carbon dioxide outgassing  
500 fuelled by wetlands, *Nature*, 505, 395-398, 2014.
- Abril, G., Bouillon, S., Darchambeau, F., Teodoru, C., Marwick, T., Tammooh, F., Omengo, F., Geeraert, N., Deirmendjian, L., Polsenaere, P., and Borges, A. V.: Technical Note: Large overestimation of  $p\text{CO}_2$  calculated from pH and alkalinity in acidic, organic-rich freshwaters, *Biogeosciences*, 12, 67-78, 2015.
- 505 Alekin, O. A., Semenov, A. D., and Skopintsev, B. A.: *Handbook of Chemical Analysis of Land Waters*, Gidrometeoizdat, St. Petersburg, Russia, 1973.
- Alin, S. R., Rasesa, M. d. F. F. L., Salimon, C. I., Richey, J. E., Holtgrieve, G. W., Krusche, A. V., and Snidvongs, A.: Physical controls on carbon dioxide transfer velocity and flux in low-gradient river systems and implications for regional carbon budgets, *Journal of Geophysical Research*, 116, G01009, doi:10.1029/2010jg001398, 2011.
- 510 American Public Health Association (APHA): *Standard Methods for the Examination of Water and Wastewater*, 16th edition, American Public Health Association, Washington, DC, 1985.
- Amiotte-Suchet, P. A., Probst, J. L., and Ludwig, W.: Worldwide distribution of continental rock lithology: Implications for the atmospheric/soil  $\text{CO}_2$  uptake by continental weathering and



515 alkalinity river transport to the oceans, *Global Biogeochemical Cycles*, 17, 1038,  
doi:10.1029/2002gb001891, 2003.

Aufdenkampe, A. K., Mayorga, E., Raymond, P. A., Melack, J. M., Doney, S. C., Alin, S. R.,  
Aalto, R. E., and Yoo, K.: Riverine coupling of biogeochemical cycles between land, oceans,  
and atmosphere, *Front Ecol Environ*, 9, 53-60, 2011.

520 Bao, H., Wu, Y., and Zhang, J.: Spatial and temporal variation of dissolved organic matter in the  
Changjiang: fluvial transport and flux estimation, *Journal of Geophysical Research:*  
*Biogeosciences*, 120, 1870-1886, 2015.

Barros, N., Cole, J. J., Tranvik, L. J., Prairie, Y. T., Bastviken, D., Huszar, V. L., Del Giorgio, P.,  
and Roland, F.: Carbon emission from hydroelectric reservoirs linked to reservoir age and  
525 latitude, *Nat Geosci*, 4, 593-596, 2011.

Battin, T. J., Luysaert, S., Kaplan, L. A., Aufdenkampe, A. K., Richter, A., and Tranvik, L. J.:  
The boundless carbon cycle, *Nat Geosci*, 2, 598-600, 2009.

Benstead, J. P., and Leigh, D. S.: An expanded role for river networks, *Nature Geosci*, 5, 678-  
679, 2012.

530 Billett, M., and Moore, T.: Supersaturation and evasion of CO<sub>2</sub> and CH<sub>4</sub> in surface waters at Mer  
Bleue peatland, Canada, *Hydrological Processes*, 22, 2044-2054, 2008.

Borges, A. V., Darchambeau, F., Teodoru, C. R., Marwick, T. R., Tamooch, F., Geeraert, N.,  
Omengo, F. O., Guérin, F., Lambert, T., and Morana, C.: Globally significant greenhouse-gas  
emissions from African inland waters, *Nat Geosci*, 8, 637-642, 2015.

535 Butman, D., and Raymond, P. A.: Significant efflux of carbon dioxide from streams and rivers in  
the United States, *Nat Geosci*, 4, 839-842, 2011.

Cauwet, G., and Mackenzie, F. T.: Carbon inputs and distribution in estuaries of turbid rivers:  
the Yang Tze and Yellow rivers (China), *Marine Chemistry*, 43, 235-246, 1993.

Chen, C.-T. A., Zhai, W., and Dai, M.: Riverine input and air-sea CO<sub>2</sub> exchanges near the  
540 Changjiang (Yangtze River) Estuary: status quo and implication on possible future changes in  
metabolic status, *Continental Shelf Research*, 28, 1476-1482, 2008.

Chen, J., Wang, F. Y., Xia, X. H., and Zhang, L. T.: Major element chemistry of the Changjiang  
(Yangtze River), *Chemical Geology*, 187, 231-255, 2002.

Chetelat, B., Liu, C. Q., Zhao, Z., Wang, Q., Li, S., Li, J., and Wang, B.: Geochemistry of the  
545 dissolved load of the Changjiang Basin rivers: anthropogenic impacts and chemical weathering,  
*Geochimica et Cosmochimica Acta*, 72, 4254-4277, 2008.

Cole, J. J., Prairie, Y. T., Caraco, N. F., McDowell, W. H., Tranvik, L. J., Striegl, R. G., Duarte,  
C. M., Kortelainen, P., Downing, J. A., Middelburg, J. J., and Melack, J.: Plumbing the global  
carbon cycle: Integrating inland waters into the terrestrial carbon budget, *Ecosystems*, 10, 171-  
550 184, 2007.

Duan, S., Xu, F., and Wang, L.-J.: Long-term changes in nutrient concentrations of the  
Changjiang River and principal tributaries, *Biogeochemistry*, 85, 215-234, 2007.

Dubois, K. D., Lee, D., and Veizer, J.: Isotopic constraints on alkalinity, dissolved organic  
carbon, and atmospheric carbon dioxide fluxes in the Mississippi River, *Journal of*  
555 *Geophysical Research: Biogeosciences*, 115, 2010.

- Gan, W. B., Chen, H. M., and Hart, Y. F.: Carbon transport by the Yangtze (at Nanjing) and Huanghe (at Jinan) Rivers, People's Republic of China, in: Transport of Carbon and Minerals in Major World Rivers, Part 2, edited by: E.T. Degens, S. Kempe, and Soliman, H., Mitt. Geol. Paläontol. Inst. Univ. Hamburg, SCOPE/UNEP Sonderbd., 459-470, 1983.
- 560 Goudie, A. S., and Viles, H. A.: Weathering and the global carbon cycle: Geomorphological perspectives, *Earth-Science Reviews*, 113, 59-71, 2012.
- Hope, D., Billett, M., and Cresser, M.: A review of the export of carbon in river water: fluxes and processes, *Environmental Pollution*, 84, 301-324, 1994.
- Humborg, C., Mörtz, C., Sundbom, M., Borg, H., Blenckner, T., Giesler, R., and Ittekkot, V.: 565 CO<sub>2</sub> supersaturation along the aquatic conduit in Swedish watersheds as constrained by terrestrial respiration, aquatic respiration and weathering, *Global Change Biology*, 16, 1966-1978, 2010.
- Hunt, C., Salisbury, J., and Vandemark, D.: Contribution of non-carbonate anions to total alkalinity and overestimation of *p*CO<sub>2</sub> in New England and New Brunswick rivers, 570 *Biogeosciences*, 8, 3069-3076, 2011.
- Ittekkot, V.: Global trends in the nature of organic matter in river suspensions, *Nature*, 332, 436-438, 1988.
- Kemenes, A., Forsberg, B. R., and Melack, J. M.: CO<sub>2</sub> emissions from a tropical hydroelectric reservoir (Balbina, Brazil), *Journal of Geophysical Research*, 116, G03004, 575 doi:10.1029/2010JG001465, 2011.
- Laruelle, G. G., Dürr, H., Lauerwald, R., Hartmann, J., Slomp, C., Goossens, N., and Regnier, P.: Global multi-scale segmentation of continental and coastal waters from the watersheds to the continental margins, *Hydrol Earth Syst Sc*, 17, 2029-2051, 2013.
- Lauerwald, R., Hartmann, J., Moosdorf, N., Kempe, S., and Raymond, P. A.: What controls the 580 spatial patterns of the riverine carbonate system? –A case study for North America, *Chemical Geology*, 337-338, 114-127, 2013.
- Lauerwald, R., Laruelle, G. G., Hartmann, J., Ciais, P., and Regnier, P. A.: Spatial patterns in CO<sub>2</sub> evasion from the global river network, *Global Biogeochemical Cycles*, 29, 534-554, 2015.
- Lewis, E., and Wallace, D. W. R.: Program developed for CO<sub>2</sub> system calculations. 585 ORNL/CDIAC-105, Carbon dioxide Information Analysis Center, Oak Ridge National Laboratory, Oak Ridge, TN., 1998.
- Li, S.-L., Liu, C.-Q., Li, J., Lang, Y.-C., Ding, H., and Li, L.: Geochemistry of dissolved inorganic carbon and carbonate weathering in a small typical karstic catchment of Southwest China: Isotopic and chemical constraints, *Chemical Geology*, 277, 301-309, 2010a.
- 590 Li, S., Cheng, X., Xu, Z., Han, H., and Zhang, Q.: Spatial and temporal patterns of the water quality in the Danjiangkou Reservoir, China, *Hydrological sciences journal*, 54, 124-134, 2009.
- Li, S., Lu, X. X., He, M., Zhou, Y., Li, L., and Ziegler, A. D.: Daily CO<sub>2</sub> partial pressure and CO<sub>2</sub> outgassing in the upper Yangtze River basin: A case study of the Longchuan River, China, *Journal of Hydrology*, 466-467, 141-150, 2012.
- 595 Li, S., Lu, X., and Bush, R. T.: CO<sub>2</sub> partial pressure and CO<sub>2</sub> emission in the Lower Mekong River, *Journal of Hydrology*, 504, 40-56, 2013.

Li, X.-D., Liu, C.-Q., Harue, M., Li, S.-L., and Liu, X.-L.: The use of environmental isotopic (C, Sr, S) and hydrochemical tracers to characterize anthropogenic effects on karst groundwater quality: A case study of the Shuicheng Basin, SW China, *Appl Geochem*, 25, 1924-1936, 2010b.

Liu, S., Lu, X. X., Xia, X., Zhang, S., Ran, L., Yang, X., and Liu, T.: Dynamic biogeochemical controls on river  $p\text{CO}_2$  and recent changes under aggravating river impoundment: an example of the subtropical Yangtze River, *Global Biogeochemical Cycles*, 30, 880-897, 2016.

Long, H., Vihermaa, L., Waldron, S., Hoey, T., Quemin, S., and Newton, J.: Hydraulics are a first-order control on  $\text{CO}_2$  efflux from fluvial systems, *Journal of Geophysical Research: Biogeosciences*, 120, 1912-1922, 2015.

Lynch, J. K., Beatty, C. M., Seidel, M. P., Jungst, L. J., and DeGrandpre, M. D.: Controls of riverine  $\text{CO}_2$  over an annual cycle determined using direct, high temporal resolution  $p\text{CO}_2$  measurements, *Journal of Geophysical Research*, 115, G03016, doi:10.1029/2009jg001132, 2010.

Marcé, R., Obrador, B., Morguá, J.-A., Riera, J. L., López, P., and Armengol, J.: Carbonate weathering as a driver of  $\text{CO}_2$  supersaturation in lakes, *Nat Geosci*, 8, 107-111, 2015.

Mayorga, E., Aufdenkampe, A. K., Masiello, C. A., Krusche, A. V., Hedges, J. I., Quay, P. D., Richey, J. E., and Brown, T. A.: Young organic matter as a source of carbon dioxide outgassing from Amazonian rivers, *Nature*, 436, 538-541, 2005.

Milliman, J. D., Qinchun, X., and Zuosheng, Y.: Transfer of particulate organic carbon and nitrogen from the Yangtze River to the ocean, *American Journal of Science*, 284, 824-834, 1984.

Ran, L., Lu, X. X., Richey, J. E., Sun, H., Han, J., Liao, S., and Yi, Q.: Long-term spatial and temporal variation of  $\text{CO}_2$  partial pressure in the Yellow River, China, *Biogeosciences*, 12, 921-932, 2015a.

Ran, L., Lu, X. X., Yang, H., Li, L., Yu, R., Sun, H., and Han, J.:  $\text{CO}_2$  outgassing from the Yellow River network and its implications for riverine carbon cycle, *Journal of Geophysical Research: Biogeosciences*, 120, 1334-1347, 2015b.

Raymond, P. A., Caraco, N. F., and Cole, J. J.: Carbon dioxide concentration and atmospheric flux in the Hudson River, *Estuaries*, 20, 381-390, 1997.

Raymond, P. A., Bauer, J. E., and Cole, J. J.: Atmospheric  $\text{CO}_2$  evasion, dissolved inorganic carbon production, and net heterotrophy in the York River estuary, *Limnology and Oceanography*, 45, 1707-1717, 2000.

Raymond, P. A., and Cole, J. J.: Increase in the export of alkalinity from North America's largest river, *Science*, 301, 88-91, 2003.

Raymond, P. A., Hartmann, J., Lauerwald, R., Sobek, S., McDonald, C., Hoover, M., Butman, D., Striegl, R., Mayorga, E., and Humborg, C.: Global carbon dioxide emissions from inland waters, *Nature*, 503, 355-359, 2013.

Regnier, P., Friedlingstein, P., Ciais, P., Mackenzie, F. T., Gruber, N., Janssens, I. A., Laruelle, G. G., Lauerwald, R., Luyssaert, S., and Andersson, A. J.: Anthropogenic perturbation of the carbon fluxes from land to ocean, *Nat Geosci*, 6, 597-607, 2013.

Richey, J. E., Melack, J. M., Aufdenkampe, A. K., Ballester, V. M., and Hess, L. L.: Outgassing  
 from Amazonian rivers and wetlands as a large tropical source of atmospheric CO<sub>2</sub>, *Nature*,  
 640 416, 617-620, 2002.

Sarma, V. V. S. S., Kumar, N. A., Prasad, V. R., Venkataramana, V., Appalanaidu, S., Sridevi,  
 B., Kumar, B. S. K., Bharati, M. D., Subbaiah, C. V., Acharyya, T., Rao, G. D., Viswanadham,  
 R., Gawade, L., Manjary, D. T., Kumar, P. P., Rajeev, K., Reddy, N. P. C., Sarma, V. V.,  
 645 Kumar, M. D., Sadhuram, Y., and Murty, T. V. R.: High CO<sub>2</sub> emissions from the tropical  
 Godavari estuary (India) associated with monsoon river discharges, *Geophys Res Lett*, 38,  
 L08601, doi:10.1029/2011gl046928, 2011.

Schlünz, B., and Schneider, R. R.: Transport of terrestrial organic carbon to the oceans by rivers:  
 re-estimating flux- and burial rates, *Int J Earth Sci*, 88, 599-606, 2000.

Syvitski, J. P. M., Vorosmarty, C. J., Kettner, A. J., and Green, P.: Impact of humans on the flux  
 650 of terrestrial sediment to the global coastal ocean, *Science*, 308, 376-380, 2005.

Telmer, K., and Veizer, J.: Carbon fluxes, pCO<sub>2</sub> and substrate weathering in a large northern  
 river basin, Canada: carbon isotope perspectives, *Chemical Geology*, 159, 61-86, 1999.

Teodoru, C., Nyoni, F., Borges, A., Darchambeau, F., Nyambe, I., and Bouillon, S.: Dynamics of  
 greenhouse gases (CO<sub>2</sub>, CH<sub>4</sub>, N<sub>2</sub>O) along the Zambezi River and major tributaries, and their  
 655 importance in the riverine carbon budget, *Biogeosciences*, 12, 2431-2453, 2015.

Wallin, M. B., Grabs, T., Buffam, I., Laudon, H., Ågren, A., Öquist, M. G., and Bishop, K.:  
 Evasion of CO<sub>2</sub> from streams—The dominant component of the carbon export through the  
 aquatic conduit in a boreal landscape, *Global Change Biology*, 19, 785-797, 2013.

Wallin, M. B., Löfgren, S., Erlandsson, M., and Bishop, K.: Representative regional sampling of  
 660 carbon dioxide and methane concentrations in hemiboreal headwater streams reveal  
 underestimates in less systematic approaches, *Global Biogeochemical Cycles*, 28, 465-479,  
 2014.

Wang, F. S., Wang, Y. C., Zhang, J., Xu, H., and Wei, X. G.: Human impact on the historical  
 change of CO<sub>2</sub> degassing flux in River Changjiang, *Geochem T*, 8, doi:10.1186/1467-4866-8-7,  
 665 2007a.

Wang, F. S., Wang, B. L., Liu, C. Q., Wang, Y. C., Guan, J., Liu, X. L., and Yu, Y. X.: Carbon  
 dioxide emission from surface water in cascade reservoirs-river system on the Maotiao River,  
 southwest of China, *Atmos Environ*, 45, 3827-3834, 2011.

Wang, X., Ma, H., Li, R., Song, Z., and Wu, J.: Seasonal fluxes and source variation of organic  
 670 carbon transported by two major Chinese Rivers: The Yellow River and Changjiang (Yangtze)  
 River, *Global Biogeochemical Cycles*, 26, GB2025, doi:10.1029/2011gb004130, 2012.

Wang, Z. Y., Li, Y., and He, Y.: Sediment budget of the Yangtze River, *Water Resour Res*, 43,  
 W04401, doi:10.1029/2006WR005012, 2007b.

Wanninkhof, R., Park, G.-H., Takahashi, T., Sweeney, C., Feely, R. A., Nojiri, Y., Gruber, N.,  
 675 Doney, S. C., McKinley, G. A., and Lenton, A.: Global ocean carbon uptake: magnitude,  
 variability and trends, *Biogeosciences*, 10, 1983-2000, 2013.

- Weyhenmeyer, G. A., Kosten, S., Wallin, M. B., Tranvik, L. J., Jeppesen, E., and Roland, F.: Significant fraction of CO<sub>2</sub> emissions from boreal lakes derived from hydrologic inorganic carbon inputs, *Nat Geosci*, 8, 933-936, 2015.
- 680 Wu, Y., Zhang, J., Liu, S. M., Zhang, Z. F., Yao, Q. Z., Hong, G. H., and Cooper, L.: Sources and distribution of carbon within the Yangtze River system, *Estuar Coast Shelf S*, 71, 13-25, 2007.
- Xu, K., and Milliman, J. D.: Seasonal variations of sediment discharge from the Yangtze River before and after impoundment of the Three Gorges Dam, *Geomorphology*, 104, 276-283, 2009.
- 685 Yang, S., Zhao, Q., and Belkin, I. M.: Temporal variation in the sediment load of the Yangtze river and the influences of human activities, *Journal of Hydrology*, 263, 56-71, 2002.
- Yao, G. R., Gao, Q. Z., Wang, Z. G., Huang, X. K., He, T., Zhang, Y. L., Jiao, S. L., and Ding, J.: Dynamics of CO<sub>2</sub> partial pressure and CO<sub>2</sub> outgassing in the lower reaches of the Xijiang River, a subtropical monsoon river in China, *Sci Total Environ*, 376, 255-266, 2007.
- 690 Zhai, W. D., Dai, M. H., and Guo, X. G.: Carbonate system and CO<sub>2</sub> degassing fluxes in the inner estuary of Changjiang (Yangtze) River, China, *Marine Chemistry*, 107, 342-356, 2007.
- Zhang, L., Xue, M., Wang, M., Cai, W.-J., Wang, L., and Yu, Z.: The spatiotemporal distribution of dissolved inorganic and organic carbon in the main stem of the Changjiang (Yangtze) River and the effect of the Three Gorges Reservoir, *Journal of Geophysical Research: Biogeosciences*, 119, 741-757, 2014.
- 695 Zhao, Y., Wu, B., and Zeng, Y.: Spatial and temporal patterns of greenhouse gas emissions from Three Gorges Reservoir of China, *Biogeosciences*, 10, 1219-1230, 2013.
- Zhu, T. X.: Gully and tunnel erosion in the hilly Loess Plateau region, China, *Geomorphology*, 153-154, 144-155, 2012.

700 Table 1. Comparison of alkalinity ( $\mu\text{eq L}^{-1}$ ) and pH at Wuhan station between the GEMS/Water Programme results and the hydrological yearbooks, expressed as mean $\pm$ standard error.

| Item                   | 1980            | 1981            | 1982            | 1983            | 1984            | 1984            |
|------------------------|-----------------|-----------------|-----------------|-----------------|-----------------|-----------------|
| GEMS/Water Programme   |                 |                 |                 |                 |                 |                 |
| Alkalinity             | 2050 $\pm$ 286  | 2004 $\pm$ 188  | 2000 $\pm$ 232  | 1838 $\pm$ 252  | 2200 $\pm$ 247  | 1992 $\pm$ 219  |
| pH                     | 7.83 $\pm$ 0.16 | 7.73 $\pm$ 0.24 | 8.04 $\pm$ 0.09 | 8.06 $\pm$ 0.05 | 8.00 $\pm$ 0.09 | 7.88 $\pm$ 0.06 |
| Hydrological yearbooks |                 |                 |                 |                 |                 |                 |
| Alkalinity             | 2310 $\pm$ 314  | 2187 $\pm$ 236  | 2274 $\pm$ 268  | 2033 $\pm$ 304  | 2383 $\pm$ 277  | 2306 $\pm$ 238  |
| pH                     | 7.93 $\pm$ 0.09 | 7.87 $\pm$ 0.09 | 8.01 $\pm$ 0.09 | 7.94 $\pm$ 0.08 | 7.93 $\pm$ 0.10 | 7.98 $\pm$ 0.08 |

Table 2. Riverine pH, alkalinity, and  $p\text{CO}_2$  in the Yangtze River basin (median±standard deviation).

| River/tributary                | Station              | pH        | Alkalinity            | $p\text{CO}_2$  |
|--------------------------------|----------------------|-----------|-----------------------|-----------------|
|                                |                      |           | $\mu\text{eq L}^{-1}$ | $\mu\text{atm}$ |
| Mainstem                       | Benzilan             | 8.29±0.11 | 2352±435              | 681±156         |
|                                | Shigu                | 8.18±0.48 | 2544±438              | 846±262         |
|                                | Jingjiangjie         | 8.11±0.12 | 2905±362              | 916±202         |
|                                | Dukou                | 8.22±0.12 | 2399±429              | 826±197         |
|                                | Longjie              | 8.23±0.17 | 2185±396              | 786±226         |
|                                | Huatan               | 8.17±0.15 | 2237±418              | 882±287         |
|                                | Pingshan             | 8.13±0.10 | 2215±407              | 1001±235        |
|                                | Zhutuo               | 7.88±0.19 | 2299±349              | 2405±781        |
|                                | Cuntan               | 8.08±0.11 | 2173±311              | 1087±319        |
|                                | Yichang              | 7.95±0.15 | 2343±300              | 1653±469        |
|                                | Luoshan              | 7.76±0.11 | 2280±248              | 2380±691        |
|                                | Wuhan                | 7.93±0.11 | 2060±263              | 1521±497        |
|                                | Datong               | 7.84±0.14 | 1919±312              | 1711±806        |
|                                | Nanjing <sup>a</sup> | 7.56±0.16 | 2339±339              | 3796±1623       |
|                                | Nanjing <sup>b</sup> | 7.54±0.18 | 2296±357              | 3793±2186       |
| Major tributaries <sup>c</sup> |                      |           |                       |                 |
| Yalongjiang                    | Xiaodeshi            | 8.02±0.22 | 2576±465              | 1567±715        |
| Daduhe                         | Fuluzhen             | 7.66±0.23 | 1909±289              | 2577±1620       |
| Minjiang                       | Gaochang             | 8.02±0.15 | 1816±327              | 1020±525        |
| Tuojiang                       | Lijiawan             | 8.01±0.11 | 2705±507              | 1504±572        |
| Jialingjiang                   | Beibei               | 8.11±0.14 | 2289±509              | 1196±244        |
| Wujiang                        | Wulong               | 8.01±0.14 | 2420±279              | 1361±508        |
| Yuanjiang                      | Taoyuan              | 7.61±0.25 | 1822±480              | 2801±2144       |
| Xiangjiang                     | Xiangtan             | 7.76±0.44 | 1739±331              | 2349±2521       |
| Hanjiang                       | Xiaoshicun           | 7.93±0.13 | 2262±480              | 1715±536        |
| Ganjiang                       | Waizhou              | 7.44±0.44 | 880±236               | 2205±2048       |
| Yangtze basin <sup>d</sup>     | 1% percentile        | 7.03      | 556                   | 788             |
|                                | 10% percentile       | 7.35      | 842                   | 1236            |
|                                | 50% percentile       | 7.71      | 2237                  | 2455            |
|                                | 90% percentile       | 8.05      | 3305                  | 4344            |
|                                | 99% percentile       | 8.28      | 4437                  | 6163            |

<sup>a</sup>affected by high tides.

<sup>b</sup>affected by low tides.

<sup>c</sup>Median values of the data for the lowermost station on the mainstem of the specific tributary.

<sup>d</sup>Statistics based on the measurements at the used 339 stations.

710

Table 3. Hydro-geochemical features of the Wujiang (Wulong station), Jialingjiang (Wusheng station), and Ganjiang (Xiajiang station) catchments.

| Control station | Control area<br>km <sup>2</sup> | Water discharge<br>m <sup>3</sup> s <sup>-1</sup> | pH        | Alkalinity          | <i>p</i> CO <sub>2</sub> | Ca <sup>2+</sup>     | SiO <sub>2</sub>     | Sedimentary rock types (% of area) |               |                       |
|-----------------|---------------------------------|---------------------------------------------------|-----------|---------------------|--------------------------|----------------------|----------------------|------------------------------------|---------------|-----------------------|
|                 |                                 |                                                   |           | μeq L <sup>-1</sup> | μatm                     | μmol L <sup>-1</sup> | μmol L <sup>-1</sup> | Carbonate                          | Siliciclastic | Igneous + metamorphic |
| Wulong          | 80,536                          | 1570                                              | 7.72±0.14 | 3021±527            | 3537±1247                | 1145±278             | 59±31                | 82.9                               | 14.8          | 2.3                   |
| Wusheng         | 80,550                          | 793                                               | 7.80±0.21 | 2484±948            | 2671±490                 | 1005±170             | 94±30                | 30.4                               | 55.3          | 14.3                  |
| Xiajiang        | 62,387                          | 1644                                              | 7.34±0.08 | 953±266             | 2642±626                 | 242±91               | 105±18               | 9.1                                | 64.7          | 26.2                  |

715

Table 4. Comparison of *p*CO<sub>2</sub> and CO<sub>2</sub> evasion among world large rivers and typical reservoirs in the Yangtze River basin.

| River                                                | Country | Climate             | <i>p</i> CO <sub>2</sub> | CO <sub>2</sub> evasion              | Reference               |
|------------------------------------------------------|---------|---------------------|--------------------------|--------------------------------------|-------------------------|
|                                                      |         |                     | μatm                     | mol m <sup>-2</sup> yr <sup>-1</sup> |                         |
| Yangtze network                                      | China   | Subtropical monsoon | 2662±1240                | /                                    | This study              |
| Upper Yangtze                                        | China   | Subtropical monsoon | 2100                     | 57                                   | Li et al., 2012         |
| Lower Yangtze                                        | China   | Subtropical monsoon | 1297±901                 | 14.2–54.4                            | Wang et al., 2007a      |
| Yangtze estuary                                      | China   | Subtropical monsoon | 650–1440                 | 15.5–34.2                            | Zhai et al., 2007       |
| Amazon                                               | Brazil  | Tropical            | 3929                     | 162.2                                | Lauerwald et al. 2015   |
| Ottawa                                               | Canada  | Temperate           | 1200                     | 14.2                                 | Telmer and Veizer, 1999 |
| Hudson                                               | USA     | Temperate           | 1125±403                 | 5.8–13.5                             | Raymond et al., 1997    |
| York estuary                                         | USA     | Temperate           | 1070±867                 | 6.3                                  | Raymond et al., 2000    |
| Mississippi                                          | USA     | Temperate           | 1335±130                 | 98.5±32.5                            | Dubois et al., 2010     |
| Yukon                                                | Canada  | Subarctic           | 582–705                  | 11.6–21.2                            | Lauerwald et al., 2015  |
| Yellow                                               | China   | Arid and semiarid   | 2810±1985                | 312.4±149.2                          | Ran et al., 2015b       |
| Xijiang (Pearl)                                      | China   | Subtropical monsoon | 2600                     | 69.2–130                             | Yao et al., 2007        |
| Mekong (>100 m wide rivers)                          | SE Asia | Tropical monsoon    | 703–1597                 | 32–138                               | Alin et al., 2011       |
| Godavari estuary                                     | India   | Tropical monsoon    | <500–33,000              | 52.6                                 | Sarma et al., 2011      |
| Global rivers                                        |         |                     | 2400                     | 131.2                                | Lauerwald et al. 2015   |
| <i>Typical reservoirs in the Yangtze River basin</i> |         |                     |                          |                                      |                         |
| Wujiang cascade reservoirs                           |         |                     | 38–3300                  | -3.3–32.5                            | Wang et al., 2011       |
| Three Gorges Reservoir (TGR)                         |         |                     | /                        | 35.1                                 | Zhao et al., 2013       |



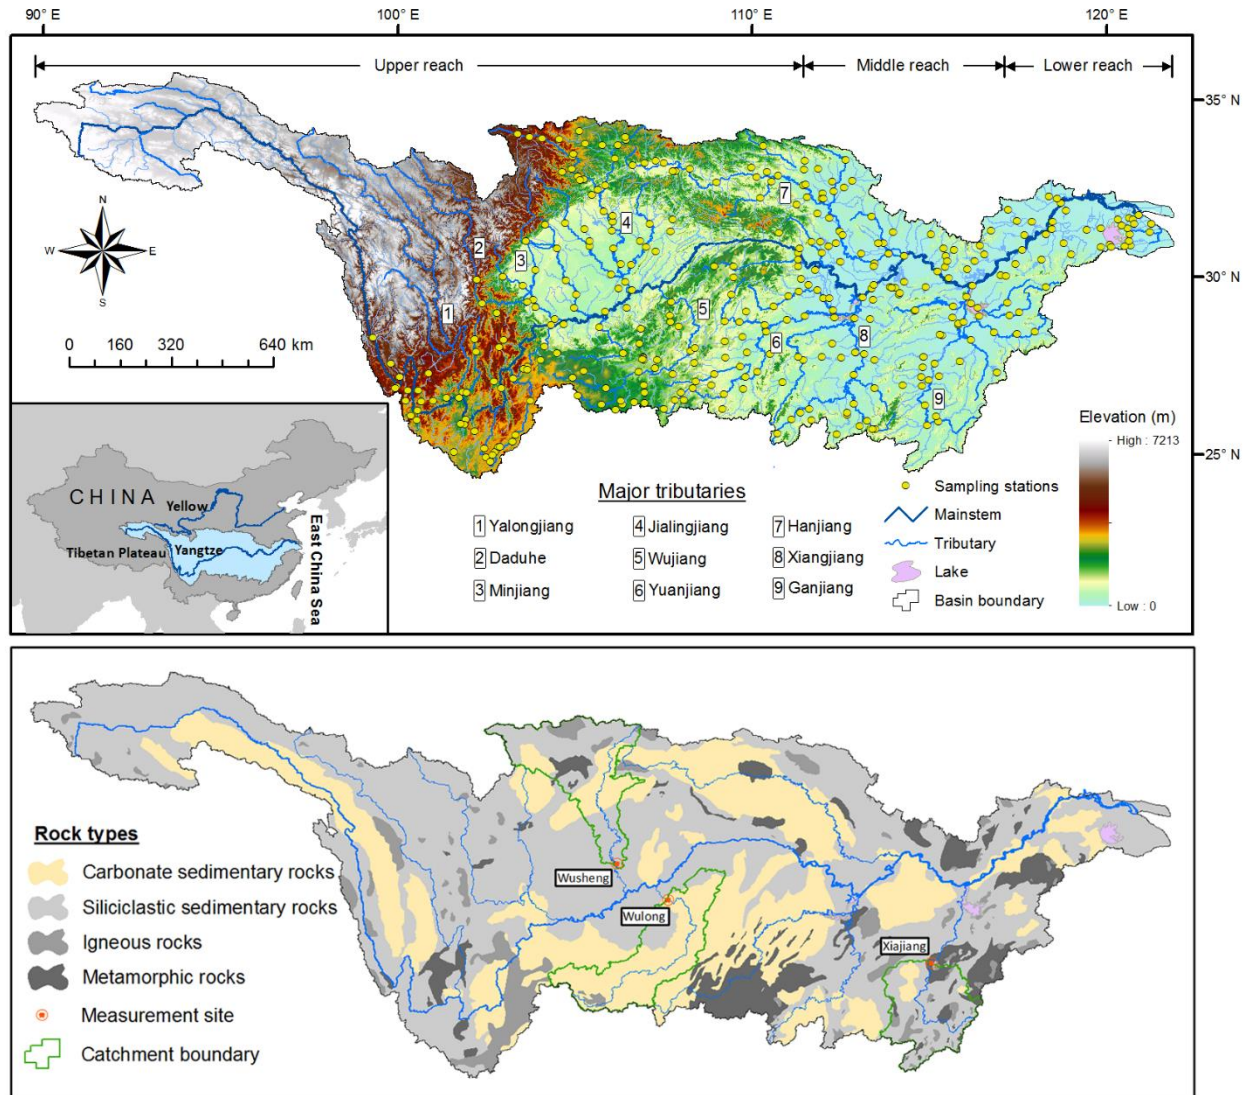

Fig. 1. Maps of the Yangtze River basin showing sampling stations (top) and rock compositions (bottom). Rock information is modified from Chen et al. (2002) and Chetelat et al. (2008).

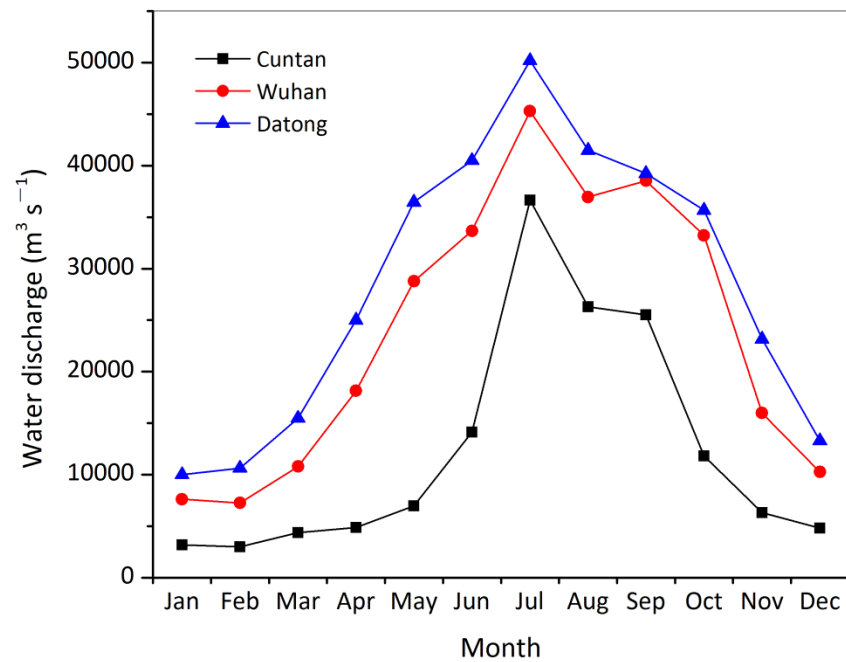

Fig. 2. Monthly variations in water discharge of the Yangtze River at Cuntan (upper reach), Wuhan (middle reach), and Datong stations (lower reach).

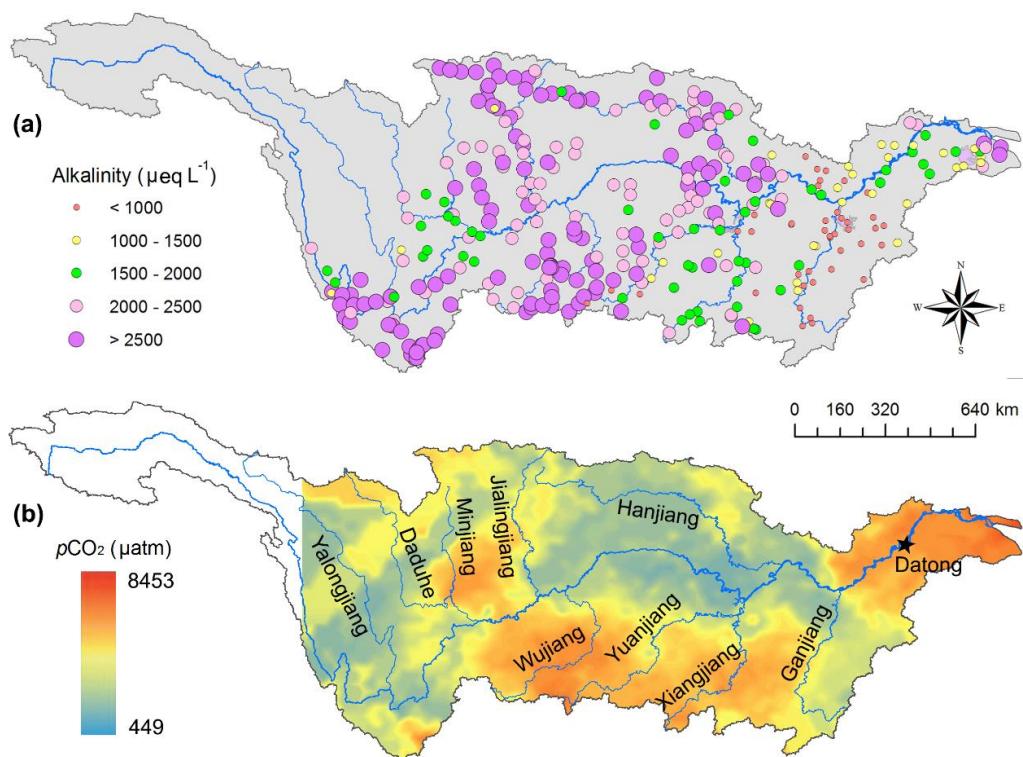

Fig. 3. Spatial distribution of alkalinity (a) and  $p\text{CO}_2$  (b) in the Yangtze River basin. The headwater region in (b) was not interpolated due to insufficient stations.

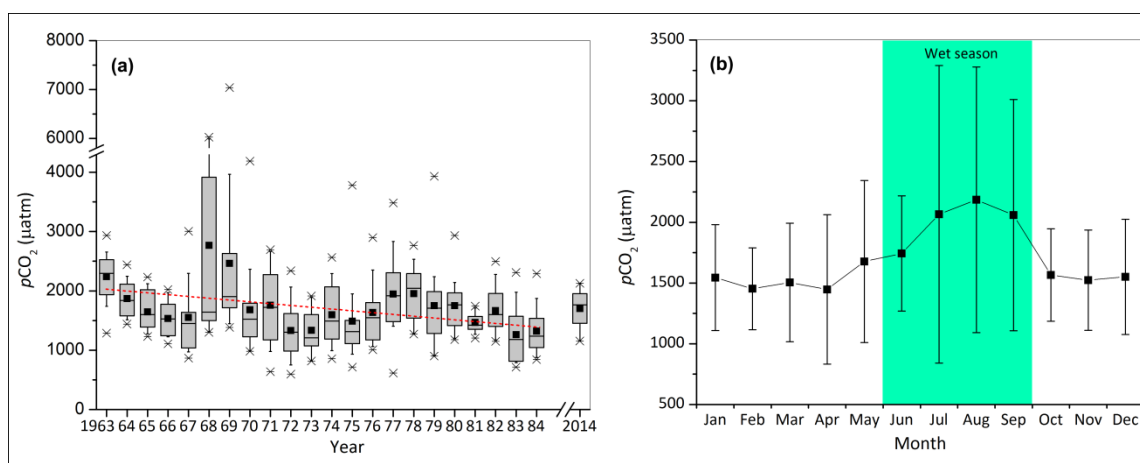

Fig. 4. Temporal variations of  $p\text{CO}_2$  at Datong station. (a) box-and-whisker plot shows significant inter-annual changes; (b) seasonal variations. The dash line in (a) represents linear regression and the values for 2014 are derived from Liu et al. (2016). Error bars denote standard deviation.

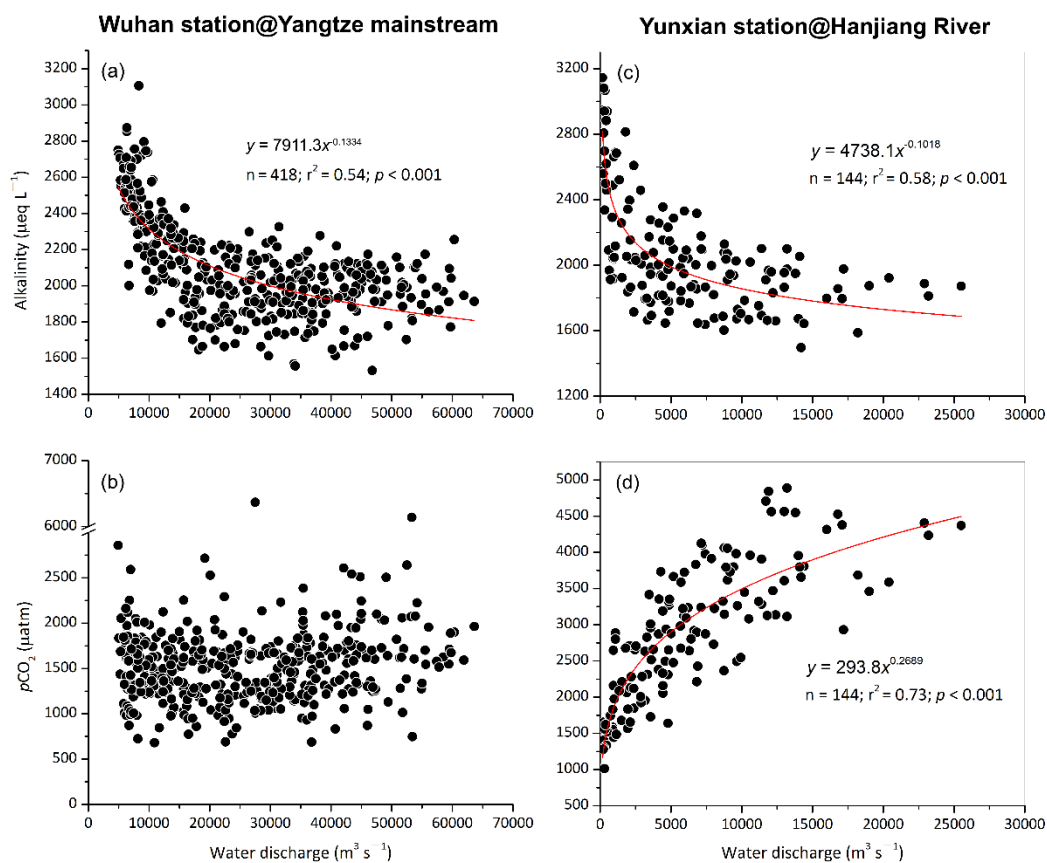

Fig. 5. Correlations between water discharge and instantaneous alkalinity and  $p\text{CO}_2$ : the mainstem at Wuhan station (a and b) and the Hanjiang River at Yunxian station (c and d).

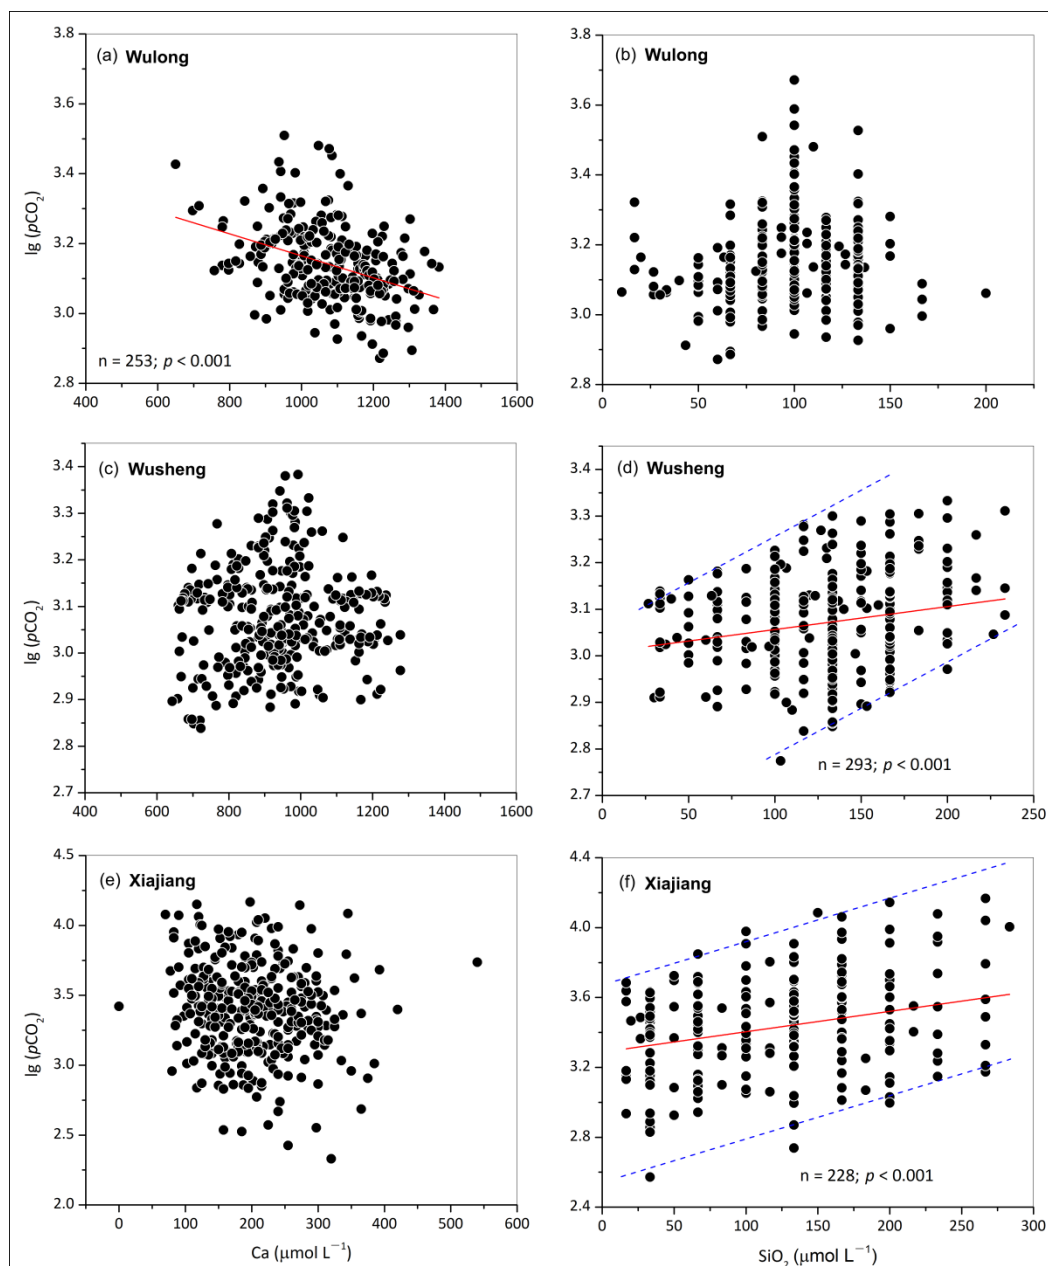

Fig. 6. Responses of  $p\text{CO}_2$  to rock weathering products in three typical catchments with distinct rock compositions: a–b: Wujiang River (Wulong station); b–c: Jialiangjiang River (Wusheng station); e–f: Ganjiang River (Xiajiang station). The solid lines represent linear regression.

740

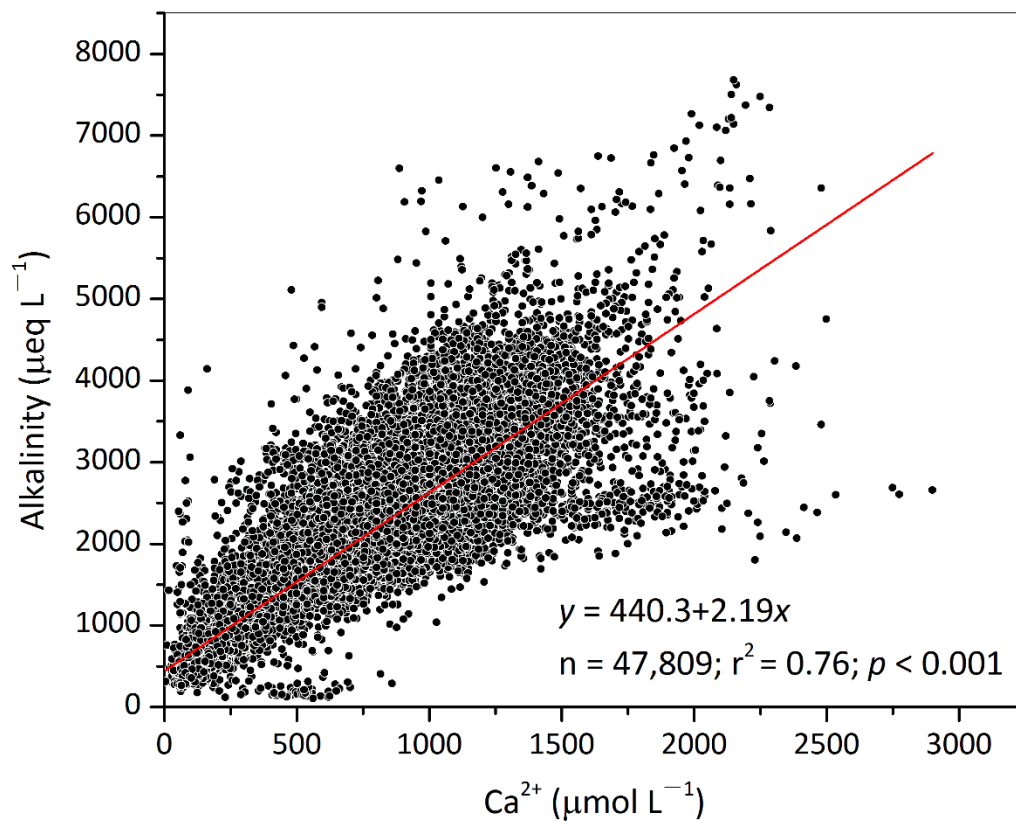

Fig. 7. Strong correlation between chemical weathering, using  $\text{Ca}^{2+}$  as a proxy, and alkalinity.

745

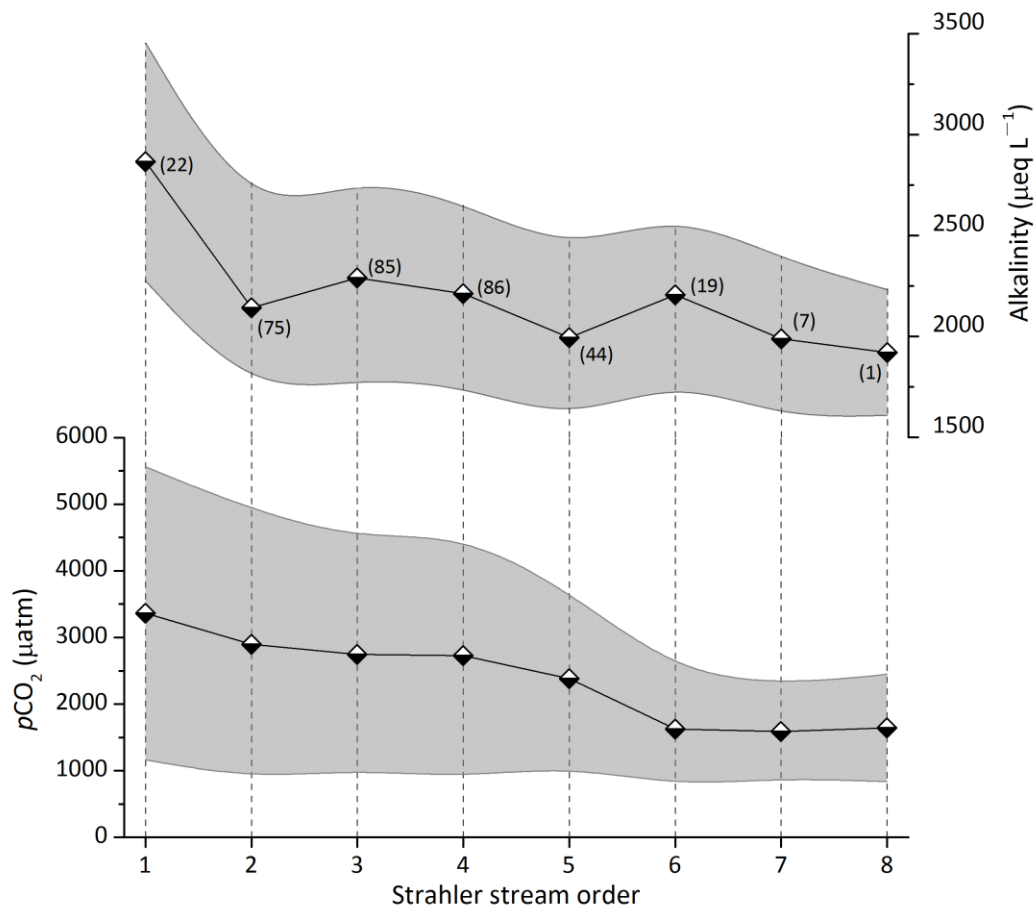

Fig. 8. Decreasing alkalinity (top) and  $p\text{CO}_2$  (bottom) with increasing Strahler stream order. The grey shade denotes standard deviation and the numbers in parentheses represent the number of stations aggregated for each stream order.
